# Supplementary material for: Schizophrenia, antipsychotic treatment adherence and driver responsibility for motor vehicle crash: a population-based retrospective study in British Columbia, Canada
Source: PubMed Central journal article supplement — BMJ Open. 2024 Jul 30;14(7):e080609. doi: 10.1136/bmjopen-2023-080609 (PMC11293420; doi:10.1136/bmjopen-2023-080609), 2024-07-30
Supplement: bmjopen-14-7-s001.pdf [file bmjopen-14-7-s001.pdf]

**Schizophrenia, antipsychotic treatment adherence,  
and driver responsibility for motor vehicle crash:  
A population-based retrospective study in British Columbia, Canada**

**Supplementary appendix**

**Table of contents**

| <b>Item</b>                                                                                                                | <b>Page</b> |
|----------------------------------------------------------------------------------------------------------------------------|-------------|
| Item S1: Conceptual model of schizophrenia and crash responsibility                                                        | 2           |
| Item S2: Data sources and missingness                                                                                      | 3           |
| Item S3: Diagnostic codes used to identify schizophrenia                                                                   | 5           |
| Item S4: Exposure criteria and other definitions                                                                           | 6           |
| Item S5: Variable definitions                                                                                              | 7           |
| Item S6: Methods used to calculate the medication possession ratio                                                         | 9           |
| <b>Exposure: Schizophrenia</b>                                                                                             |             |
| Item S7: Baseline patient characteristics at schizophrenia diagnosis date                                                  | 12          |
| Item S8: Age at schizophrenia diagnosis in the study cohort                                                                | 14          |
| Item S9: Responsibility score components among responsible and non-responsible drivers                                     | 16          |
| Item S10: Other crash characteristics among responsible and non-responsible drivers                                        | 20          |
| Item S11: Mirrored histogram of responsibility score components among responsible and non-responsible drivers              | 22          |
| Item S12: Results for the main analysis of schizophrenia and crash responsibility                                          | 23          |
| Item S13: Subgroup and sensitivity analyses of schizophrenia and crash responsibility                                      | 24          |
| <b>Exposure: Near-optimal antipsychotic adherence</b>                                                                      |             |
| Item S14: Description of antipsychotic prescription fills                                                                  | 27          |
| Item S15: Antipsychotic medication possession ratio in the first year after initiation of antipsychotics for schizophrenia | 28          |
| Item S16: Responsibility score components among responsible and non-responsible drivers                                    | 29          |
| Item S17: Other crash characteristics among responsible and non-responsible drivers                                        | 33          |
| Item S18: Mirrored histogram of responsibility score components among responsible and non-responsible drivers              | 35          |
| Item S19: Sensitivity analysis of alternate MPR calculation lookback intervals                                             | 36          |
| Item S20: Comparison of crash rates                                                                                        | 37          |
| Item S21: Responsible crash rates by strata of antipsychotic adherence                                                     | 38          |
| Item S22: Assessment of correlation                                                                                        | 39          |
| Item S23: Sample sizes from prior epidemiological studies on schizophrenia and crash                                       | 41          |
| References                                                                                                                 | 43          |

**Item S1: Conceptual model of schizophrenia and crash responsibility**

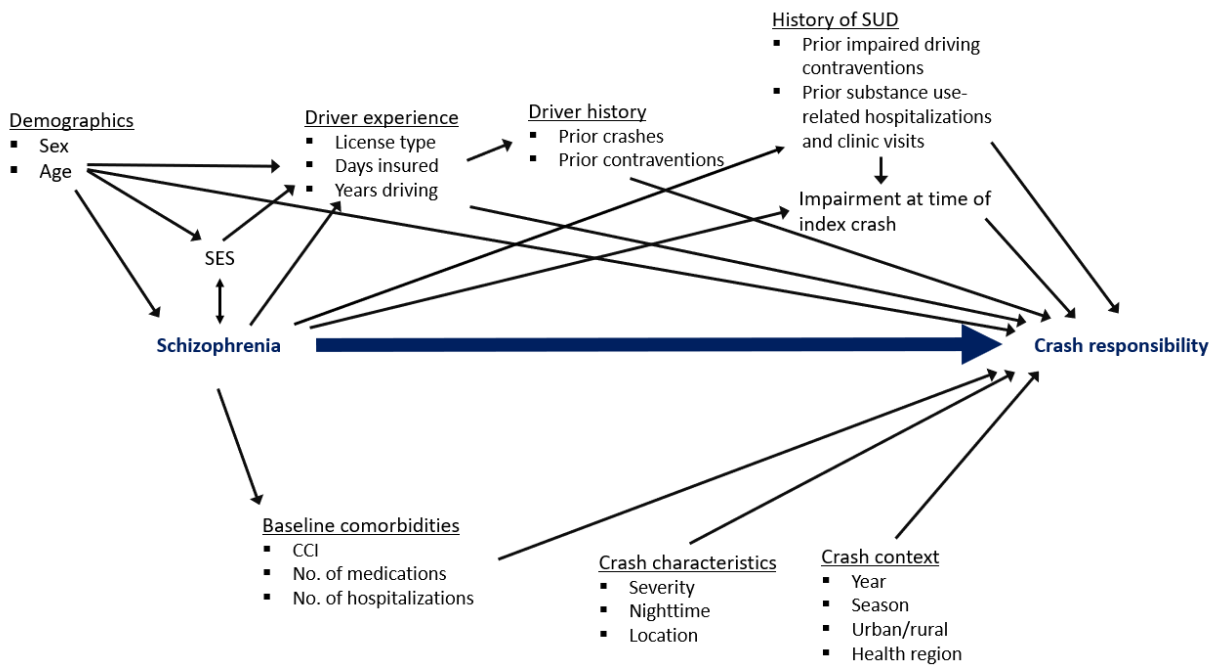

**Legend.** Directed acyclic graph (DAG) depicting relationships between schizophrenia, crash responsibility, and potential confounders. SES = socioeconomic status; SUD = substance use disorder; CCI = Charlson comorbidity index.

## Item S2a: Data sources

We accessed health data through Population Data BC, a university-based repository for individual-level longitudinal administrative health data on all BC residents.<sup>1</sup> Probabilistic linkage between driver licence and personal health number (PHN) was based on name, sex, and birthdate and achieved linkage rates  $\geq 95\%$ .<sup>2-4</sup> All BC residents who held a driver license during the study period were eligible for linkage. Our specific data sources included:

- **Discharge Abstract Database:** Canadian Institute for Health Information [creator] (2017): Discharge Abstract Database (Hospital Separations). Population Data BC [publisher]. Data Extract. MOH (2017). <http://www.popdata.bc.ca/data>.
- **PharmaNet:** BC Ministry of Health [creator] (2018): PharmaNet. V2. BC Ministry of Health [publisher]. Data Extract. Data Stewardship Committee (2018). <http://www.popdata.bc.ca/data>.
- **Medical Services Plan:** British Columbia Ministry of Health [creator] (2017): Medical Services Plan (MSP) Payment Information File. Population Data BC [publisher]. Data Extract. MOH (2017). <http://www.popdata.bc.ca/data>.
- **Consolidation File:** British Columbia Ministry of Health [creator] (2017): Consolidation File (MSP Registration & Premium Billing). Population Data BC [publisher]. Data Extract. MOH (2017). <http://www.popdata.bc.ca/data>.
- **BC Vital Statistics Agency** [creator] (2017): Vital Statistics Deaths. V2. Population Data BC [publisher]. Data Extract BC Vital Statistics Agency (2017). <http://www.popdata.bc.ca/data>.
- **Statistics Canada, Small Area and Administrative Data Division** [creator] (2017): Income Band data file. Population Data BC [publisher]. Data Extract. Statistic Canada (2017). <http://www.popdata.bc.ca/data>.
- **Income Band:** Statistics Canada [creator]: Statistics Canada Income Band Data. Catalogue Number: 13C0016. V2. Population Data BC [publisher]. Data Extract. Population Data BC (2017). <http://www.popdata.bc.ca/data>.
- **Driver data:** Insurance Corporation of British Columbia [creator] (2017): Driver Experience, Contraventions, and Exam tables and the Traffic Accident System. Insurance Corporation of British Columbia [publisher]. Data Extract. ICBC (2017). <http://www.popdata.bc.ca/data>.

All inferences, opinions and conclusions drawn in this manuscript are those of the authors and do not reflect the opinions or policies of the Data Stewards.

## Item S2b. Missing data

Study datasets are highly complete for all critical study variables (**Item S2c**):

**a) Exposure variables (schizophrenia, antipsychotic adherence)** are never missing as they are defined by hospital/clinic visit diagnostic codes and outpatient prescription fills, and these variables are highly complete.<sup>5</sup> Exposure misclassification (e.g., schizophrenia present but no associated hospital/clinic visit/prescription codes in the lookback) is probably uncommon.<sup>6</sup>

**b) Outcome (crash responsibility)** is almost never missing. Police report factors that contribute to the crash (e.g., animal on road, speeding, defective brakes). The absence of these factors on the report indicates the officer believed these factors did not contribute to the crash (and thus do not

exonerate the driver of responsibility). Less than 2% of TAS police reports are excluded because they are missing data in  $\geq 3$  scoring categories.

**c)** Breath alcohol level is usually not reported because the attending officer may not obtain a breath alcohol level if they do not suspect impairment. There is evidence of impairment (positive breath alcohol level, police suspicion of impairment by alcohol or drugs) in 6.6% of crash-involved drivers (**Item S10**).

**d)** Missingness in other key variables (e.g., age, sex, number of prior hospitalizations, license type, years of driving experience; **Item S5**) were within acceptable range (<5%) and did not necessitate the use of multiple imputation.<sup>7,8</sup>

### Item S2c. Proportion of missing data for key variables in the study cohort

| Full covariate description                                     | Proportion missing | Handling of missing data                                                                                                                                                                                                           |
|----------------------------------------------------------------|--------------------|------------------------------------------------------------------------------------------------------------------------------------------------------------------------------------------------------------------------------------|
| Age at time of crash                                           | 0%                 | No data missing.                                                                                                                                                                                                                   |
| Sex                                                            | <0.1%              | Included 3 categories for sex (male, female, missing).                                                                                                                                                                             |
| Residential neighbourhood household income quintile            | 4.1%               | Included 6th category for QAIPPE, set as 0 (0 = missing, 1 = first quintile, up to 5).                                                                                                                                             |
| Residential neighbourhood rurality                             | 2.5%               | Included extra category for missing.                                                                                                                                                                                               |
| Region (Health Authority)                                      | 2.7%               | Included extra category for missing.                                                                                                                                                                                               |
| Comorbidities (including prior alcohol or other drug use)      | 0%                 | If no physician visits and hospitalizations are present in the data, the comorbidity was deemed absent.                                                                                                                            |
| Prior hospitalization for schizophrenia                        | 0%                 | If no hospitalizations present in the data, assumed count of 0.                                                                                                                                                                    |
| Most advanced license type achieved at the time of the crash   | 0.4%               | If no data available for individual prior to crash, assumed did not have license, added category "none".                                                                                                                           |
| Years with full license                                        | 0%                 | All drivers without full licenses at crash set to 0.                                                                                                                                                                               |
| Number of police-attended crashes in prior 3 years             | 0%                 | If no data present assumed no crashes.                                                                                                                                                                                             |
| Number of contraventions in prior 3 years                      | 0%                 | If no data present assumed no contraventions.                                                                                                                                                                                      |
| Year of crash                                                  | 0%                 | No data missing.                                                                                                                                                                                                                   |
| Season of crash                                                | 0%                 | No data missing.                                                                                                                                                                                                                   |
| Crash severity (fatality, injury, property damage only)        | 0%                 | No data missing.                                                                                                                                                                                                                   |
| Crash location (city streets, rural road, highway)             | 0%                 | No data missing.                                                                                                                                                                                                                   |
| Any documented impairment by alcohol or drugs at time of crash | 0%                 | If evidence of impairment present in data (i.e., police suspicion of impairment, impairment-related contraventions, nonzero breath or blood alcohol), assume impaired. If no evidence of impairment present, assumed not impaired. |
| Number of months between schizophrenia onset and crash         | 0%                 | No data missing.                                                                                                                                                                                                                   |

**Item S3: Diagnostic codes used to identify schizophrenia**

| Purpose                                            | Database                                           | Description                                                                   | ICD codes                    |
|----------------------------------------------------|----------------------------------------------------|-------------------------------------------------------------------------------|------------------------------|
| Identify physician clinic visits for schizophrenia | Medical Services Plan (MSP), ICD-9-CM codes        | Schizophrenic disorders                                                       | 295                          |
|                                                    |                                                    | Simple type schizophrenia*                                                    | 2950                         |
|                                                    |                                                    | Disorganized type schizophrenia*                                              | 2951                         |
|                                                    |                                                    | Catatonic type schizophrenia*                                                 | 2952                         |
|                                                    |                                                    | Paranoid type schizophrenia*                                                  | 2953                         |
|                                                    |                                                    | Schizophreniform disorder*                                                    | 2954                         |
|                                                    |                                                    | Latent schizophrenia*                                                         | 2955                         |
|                                                    |                                                    | Schizophrenic disorders, residual type*                                       | 2956                         |
|                                                    |                                                    | Schizoaffective disorder, unspecified*                                        | 2957                         |
|                                                    |                                                    | Other specified types of schizophrenia*                                       | 2958                         |
|                                                    |                                                    | Unspecified schizophrenia*                                                    | 2959                         |
|                                                    |                                                    | Personal history of schizophrenia                                             | V110                         |
| Identify index hospitalization for schizophrenia   | Discharge Abstract Database (DAD), ICD-10-CA codes | Schizophrenia                                                                 | F20                          |
|                                                    |                                                    | Paranoid schizophrenia                                                        | F200                         |
|                                                    |                                                    | Disorganized schizophrenia                                                    | F201                         |
|                                                    |                                                    | Catatonic schizophrenia                                                       | F202                         |
|                                                    |                                                    | Undifferentiated schizophrenia                                                | F203                         |
|                                                    |                                                    | Post-schizophrenic depression                                                 | F204                         |
|                                                    |                                                    | Residual schizophrenia                                                        | F205                         |
|                                                    |                                                    | Simple schizophrenia                                                          | F206                         |
|                                                    |                                                    | Other schizophrenia (schizophreniform disorder, other)                        | F208                         |
|                                                    |                                                    | Schizophrenia, unspecified                                                    | F209                         |
|                                                    |                                                    | Schizoaffective disorders (bipolar type, depressive type, other, unspecified) | F250, F251, F252, F258, F259 |

**Legend.** Asterisk (\*) indicates inclusion of the following subtypes: unspecified, subchronic, chronic, subchronic with acute exacerbation, chronic with acute exacerbation, in remission. ICD-9-CM = International Classification of Diseases, Ninth Revision, Clinical Modification. ICD-10-CA = International Statistical Classification of Diseases and Related Health Problems, Tenth Revision, Canada.

**Item S4: Exposure criteria and other definitions**

| Exposure                       | Exposure criteria                                                                                                                                                                                                                                                                                                                                                                                                                                                                                                                                                                                                                                                                                                                                                                                                                                                                                                                                                                                                                                                                                                                                                                                                                                                                                                                                                                                                                             |
|--------------------------------|-----------------------------------------------------------------------------------------------------------------------------------------------------------------------------------------------------------------------------------------------------------------------------------------------------------------------------------------------------------------------------------------------------------------------------------------------------------------------------------------------------------------------------------------------------------------------------------------------------------------------------------------------------------------------------------------------------------------------------------------------------------------------------------------------------------------------------------------------------------------------------------------------------------------------------------------------------------------------------------------------------------------------------------------------------------------------------------------------------------------------------------------------------------------------------------------------------------------------------------------------------------------------------------------------------------------------------------------------------------------------------------------------------------------------------------------------|
| <b>Schizophrenia</b>           | <p>One hospital admission for schizophrenia (ICD-10-CA codes F20 or F25 or corresponding daughter codes in most responsible diagnosis field of DAD), or three physician visits for schizophrenia within 36 months (ICD-9-CM code 295 or daughter codes in diagnosis field of MSP).<sup>6</sup> We only considered a crash-involved driver to be "exposed" (i.e., to have a diagnosis of schizophrenia) if the schizophrenia "diagnosis date" was before the crash date.</p> <p>This definition was previously validated in Canadian administrative health data (sensitivity, 97%; specificity, 57%); a sensitivity analysis examines an alternate case definition that requires one or more hospitalization for schizophrenia (sensitivity, 82%; specificity, 75%).<sup>6</sup></p> <p><b>Diagnosis date:</b> date of first hospitalization or clinic visit for <i>schizophrenia</i>.</p> <p><b>Onset date:</b> date of first hospitalization or clinic visit for <i>schizophrenia or psychosis</i> in the 3 years prior to diagnosis date.</p>                                                                                                                                                                                                                                                                                                                                                                                               |
| <b>Antipsychotic adherence</b> | <p>Quantified using the 'medication possession ratio' (MPR), defined as the number of days of antipsychotic dispensed in or overlapping with the 30-day interval leading up to the crash.</p> <p>It was not possible to determine how days in hospital influenced the MPR numerator because inpatient medications are not available from PharmaNet or any other province-wide data source. However, days in hospital were uncommon in the 30-day interval leading up to the crash (corresponding to ~7% of crash-involved drivers but only ~2% of driver-days in that interval). We performed a sensitivity analysis that excluded all individuals with days in hospital in the pre-crash interval. It yielded results similar to the main analysis suggesting that this source of uncertainty did not substantially bias our results.</p> <p>Antipsychotic medications were identified in PharmaNet outpatient pharmacy dispensing data using standard Anatomical Therapeutic Chemical (ATC) codes:<sup>9</sup></p> <ul style="list-style-type: none"> <li>- Antipsychotics: N05A, excluding lithium (N05AN01)</li> <li>- Long-acting injectable antipsychotic ("depot antipsychotics") are injections administered every 2 weeks or more. These were also identified using PharmaNet data.</li> </ul> <p><b>Near-optimal adherence:</b> MPR ≥0.8<br/> <b>Suboptimal adherence:</b> MPR&lt;0.8<br/> <b>Complete non-adherence:</b> MPR=0</p> |

**Item S5: Variable definitions**

| <b>Variables</b>                                                | <b>Description</b>                                                                                                                                                                                                                                          |
|-----------------------------------------------------------------|-------------------------------------------------------------------------------------------------------------------------------------------------------------------------------------------------------------------------------------------------------------|
| <b>Outcome</b>                                                  |                                                                                                                                                                                                                                                             |
| Crash responsibility                                            | Dichotomized as 'responsible' (score $\leq 13$ ) or 'non-responsible' (score $\geq 16$ ). Indeterminate scores (14 - 15) are excluded from further analysis.                                                                                                |
| <b>Exposures</b>                                                |                                                                                                                                                                                                                                                             |
| Schizophrenia                                                   | Diagnosis of schizophrenia established any time prior to the crash.                                                                                                                                                                                         |
| Medication Possession Ratio (MPR)                               | Calculated as the number of days of medication dispensed in or overlapping with a given interval divided by the number of days in that interval. Dichotomized to 'sub-optimal' ( $< 0.80$ ) versus 'near-optimal' ( $\geq 0.80$ ) for the primary analysis. |
| <b>Potential confounders</b>                                    |                                                                                                                                                                                                                                                             |
| <b>Demographic</b>                                              |                                                                                                                                                                                                                                                             |
| Age                                                             | Categorical                                                                                                                                                                                                                                                 |
| Sex                                                             | Male; Female; Missing                                                                                                                                                                                                                                       |
| Residential neighbourhood household income quintile             | Ordinal variable (1 = lowest income, 5 = highest income) generated by Population Data BC using census data and residential Forward Sortation Area (FSA is defined by the first three digits of the residential postal code)                                 |
| Residential rurality                                            | Rural areas and small population centres (towns) vs medium and large population centres (cities), according to population density within residential Forward Sortation Area.                                                                                |
| Region (Health Authority)                                       | BC's 5 health authority regions: Vancouver Coastal; Vancouver Island; Fraser; Interior; Northern. Determined according to residential Forward Sortation Area.                                                                                               |
| <b>Road exposure</b>                                            |                                                                                                                                                                                                                                                             |
| License type                                                    | Full license; Novice license; Learner license                                                                                                                                                                                                               |
| Days insured                                                    | Number of days insured in the lookback period. Continuous variable.                                                                                                                                                                                         |
| <b>Driving experience</b>                                       |                                                                                                                                                                                                                                                             |
| Years of driving experience                                     | Crash date minus date of first full license. Continuous variable.                                                                                                                                                                                           |
| Number of police-attended crashes in 3y lookback period         | Continuous variable.                                                                                                                                                                                                                                        |
| Number of non-impaired contraventions in 3y lookback period     | Traffic violations include speeding and distracted driving (but excluding impairment by alcohol or drugs). Continuous variable.                                                                                                                             |
| Number of impaired driving contraventions in 3y lookback period | Traffic violations indicating impairment by alcohol or drugs. Continuous variable.                                                                                                                                                                          |
| <b>Crash characteristics</b>                                    |                                                                                                                                                                                                                                                             |
| Crash severity                                                  | Property damage only; Injury; Fatality                                                                                                                                                                                                                      |
| Nighttime crash                                                 | Yes if crash occurred between 9pm and 6am.                                                                                                                                                                                                                  |
| Crash location type                                             | City street; Highway                                                                                                                                                                                                                                        |
| Impairment by alcohol or drugs                                  | Any documented impairment by drugs and alcohol (police suspicion of impairment, impairment-related contraventions, positive breath alcohol).                                                                                                                |
| Year of crash                                                   | Calendar year                                                                                                                                                                                                                                               |
| Season of crash                                                 | Dec-Feb (Winter); Mar-May (Spring); Jun-Aug (Summer); Sep-Nov (Fall)                                                                                                                                                                                        |
| <b>Health</b>                                                   |                                                                                                                                                                                                                                                             |
| Number of distinct medications                                  | Total number of different classes of medications that are prescribed in a 90-day lookback period.                                                                                                                                                           |

|                                                                                          |                                                                                                                                                                                         |
|------------------------------------------------------------------------------------------|-----------------------------------------------------------------------------------------------------------------------------------------------------------------------------------------|
| Psychiatric hospitalizations in the 3y lookback period                                   | Number of psychiatric hospitalizations in the 3y lookback period excluding hospitalizations for SUDs. Intended to reflect recent stability of psychiatric disease. Continuous variable. |
| Hospitalization or clinic visits for alcohol or other drug use in the 3y lookback period | Number of hospitalizations or outpatient physician visits for alcohol or other drug use in the 3y lookback period. Continuous variable.                                                 |
| CCI in the 3y lookback period                                                            | Dichotomized variable for Charlson Comorbidity Index $\geq 2$ (yes/no)                                                                                                                  |

**Legend.** Potential confounders were identified using a causal model based on expert knowledge, literature review, and previous experience with the study data (**Item S1**). All models were forced to include confounders with known strong effects: age, sex, license type, number of crashes in 3-year lookback, number of contraventions related to impairment by alcohol or drugs in 3-year lookback, number of non-impairment-related contraventions in 3-year lookback, and documented impairment at the time of index crash. We selected additional confounders for inclusion in each model using recommended procedures:<sup>10</sup>

- (i) We identified the initial set of potential confounders ensuring we maintained more than 25 events-per-variable (EPV) in the global model;
- (ii) we performed variable selection only on variables not forced into the model because they had no known strong effect;
- (iii) we removed variables using backward selection;
- (iv) we conducted a stability investigation to understand the impact of variable selection by repeating the variable selection procedure on 200 bootstrap resamples of the dataset. We examined standard stability metrics such as the difference between the mean of the re-sampled coefficient and the global model estimate to assess possible bias, and the root mean squared difference ratio to estimate the extent of variance inflation or deflation induced by model selection.



**Item S6: Methods used to calculate the medication possession ratio (MPR)**

**Item S6a: Calculation of MPR.** The medication possession ratio (MPR) reflects actual medication consumption and is widely accepted as a valid method to assess adherence.<sup>11-14</sup> We calculated MPR for the 30-day interval prior to each police-attended crash for all crash-involved drivers in the adherence cohort (schizophrenia diagnosis date  $\geq 30$  days prior to the crash;  $\geq 1$  antipsychotic prescription fill after the diagnosis date;  $\geq 1$  antipsychotic prescription fill in the year prior to crash). MPR was calculated as the total number of days of antipsychotic supplied in or overlapping with the 30-day interval prior to crash, divided by 30 days. If a driver was involved in multiple police-attended crashes over the study interval, MPR was calculated independently for each crash.

Treatment of prescription fills that overlap with the start or end of the 30-day pre-crash window. We used standard procedures to account for:

- i) prescription fills that were dispensed prior to the window but appeared to overlap with the window based on the dispensation date and days supplied;
- ii) prescription fills that were dispensed within the window but continued after the crash based on the dispensation date and days supplied.

In both cases, these procedures only included the days supplied that fell within the 30-day pre-crash interval (**Item S6b**). This ensures that all MPR values remain  $\leq 1.0$ .

**Item S6b: Prescription fills overlapping with the bounds of the 30-day pre-crash window**

Prescription fill overlaps with the start of the 30-day pre-crash window

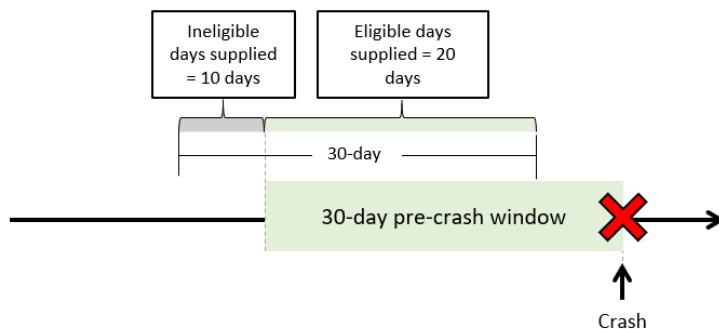

Prescription fill overlaps with the crash date

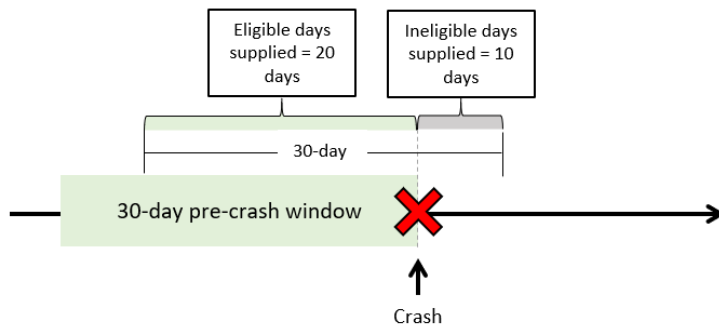

**Item S6c: Treatment of prescription fills that overlap with prior or subsequent prescription fills**  
As in prior research, we applied consistent rules that aim to reduce underestimation or overestimation of MPR arising from overlapping prescriptions.<sup>15,16,17</sup> Our primary analysis handled overlapping prescriptions using the following rules (**Item S6d**):

1. If two prescriptions of the *same drug* were dispensed on the same date, we assumed concurrent use (DrugA 10mg tabs QD mitte 7 days on day 1 + DrugA 5mg tabs QD mitte 7 days dispensed on day 1 = 7 days supplied);
2. If the overlap between two prescriptions of the *same drug* was  $\geq 1$  day and  $\leq 7$  days, we assumed that the later prescription was an early refill and that the patient would wait until the previous prescription had run out before starting the next prescription (DrugA 10mg tabs QD mitte 7 days dispensed on day 1 + DrugA 10mg tabs QD mitte 7 days dispensed on day 5 = 14 days supplied);
3. If the overlap between two prescriptions of the *same drug* was  $>7$  days, we assumed concurrent use (DrugA 10mg tabs QD mitte 30 days dispensed on day 1 + DrugA 10mg tabs QD mitte 30 days dispensed on day 10 = 39 days supplied; this might occur if the first set of pills were lost);
4. If two *different drugs* were dispensed on the same date, we assumed concurrent use (DrugA 10mg tabs QD mitte 7 days + DrugB 5mg tabs QD mitte 7 days dispensed on the same date = 7 days supplied);
5. If the overlap between two prescriptions of *different drugs* was between  $\geq 1$  and  $\leq 7$  days, we assumed that the patient stopped taking the previous drug and switched to the later drug on the day that the later drug was dispensed (DrugA 10mg tabs QD mitte 7 days dispensed on day 1 + DrugB 10mg tabs QD mitte 7 days dispensed on day 5 = 11 days supplied);
6. If the overlap between two prescriptions of *different drugs* was  $>7$  days, we assumed concurrent use (DrugA 10mg tabs QD mitte 30 days dispensed on day 1 + DrugB 10mg tabs QD mitte 30 days dispensed on day 10 = 39 days supplied).

**Item S6d: Prescription fills with overlapping days supplied**

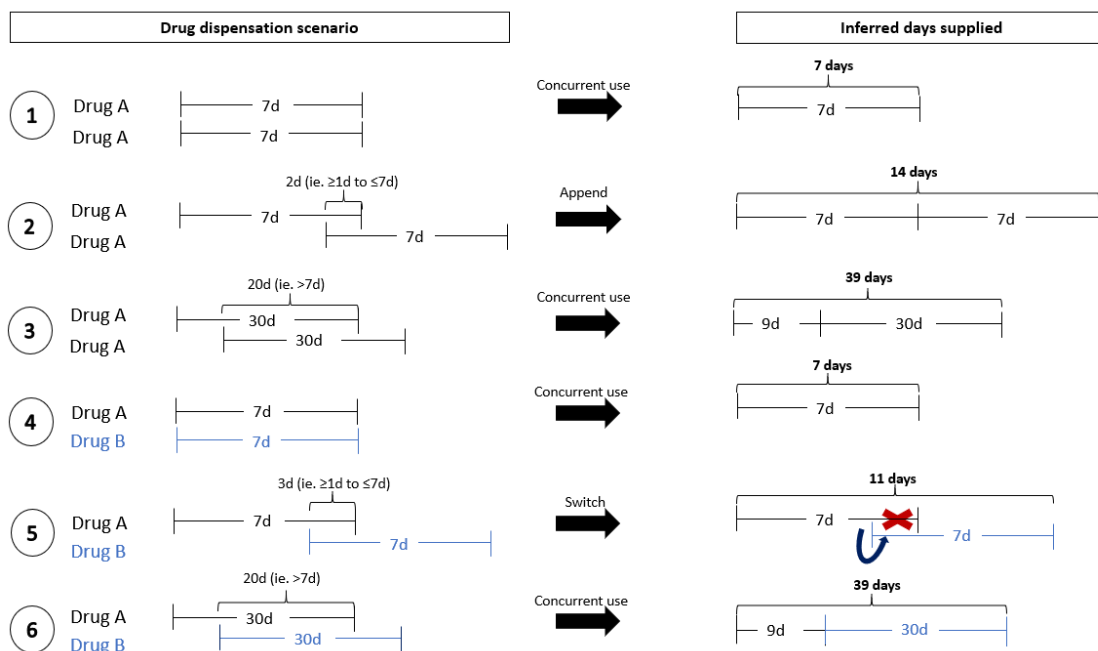

**Legend.** The figure depicts scenarios 1 – 6 from **Item S6c**. When we assumed concurrent use, the overlapping days supplied were only counted once. When the patient was assumed to switch from one drug to a different one, the days supplied of the previous prescription was cut off to end the day before the later drug was dispensed. When we assumed an early refill, the date dispensed of the later prescription was shifted to start the day after the previous prescription had ended. In this case, the original days supplied was maintained; however, with an adjusted date dispensed.

**Item S7: Baseline patient characteristics at schizophrenia diagnosis date**

| Characteristic                                             | Drivers with schizophrenia, count (%)<br>n = 24,076 | Drivers with schizophrenia involved in a crash, count (%)<br>n = 2365 | Drivers with schizophrenia, not involved in a crash, count (%)<br>n = 21,711 | p-values, crash vs no crash |
|------------------------------------------------------------|-----------------------------------------------------|-----------------------------------------------------------------------|------------------------------------------------------------------------------|-----------------------------|
| <b>Median age [Q1, Q3] (years)</b>                         | 38 [25, 52]                                         | 32 [22, 43]                                                           | 39 [26, 53]                                                                  | <0.001                      |
| <b>Age categories</b>                                      |                                                     |                                                                       |                                                                              | <0.001                      |
| . ≤20 years                                                | 2979 (12.4%)                                        | 427 (18.1%)                                                           | 2552 (11.8%)                                                                 |                             |
| . 21 to 44 years                                           | 12,032 (50%)                                        | 1387 (58.6%)                                                          | 10,645 (49.0%)                                                               |                             |
| . 45 to 64 years                                           | 6039 (25.1%)                                        | 477 (20.2%)                                                           | 5562 (25.6%)                                                                 |                             |
| . ≥65 years                                                | 3026 (12.6%)                                        | 74 (3.1%)                                                             | 2952 (13.6%)                                                                 |                             |
| <b>Male sex</b>                                            | 14,515 (60.3%)                                      | 1553 (65.7%)                                                          | 12,962 (59.7%)                                                               | <0.001                      |
| <b>Rural residence</b>                                     | 9107 (37.8%)                                        | 1048 (44.3%)                                                          | 8059 (37.1%)                                                                 | <0.001                      |
| <b>Residential neighbourhood household income quintile</b> |                                                     |                                                                       |                                                                              | 0.006                       |
| . 1 (lowest income)                                        | 6835 (28.4%)                                        | 620 (26.2%)                                                           | 6215 (28.6%)                                                                 |                             |
| . 2                                                        | 4975 (20.7%)                                        | 479 (20.3%)                                                           | 4496 (20.7%)                                                                 |                             |
| . 3                                                        | 4207 (17.5%)                                        | 427 (18.1%)                                                           | 3780 (17.4%)                                                                 |                             |
| . 4                                                        | 3774 (15.7%)                                        | 425 (18.0%)                                                           | 3349 (15.4%)                                                                 |                             |
| . 5 (highest income)                                       | 3582 (14.9%)                                        | 357 (15.1%)                                                           | 3225 (14.9%)                                                                 |                             |
| . Missing                                                  | 703 (2.9%)                                          | 57 (2.4%)                                                             | 646 (3%)                                                                     |                             |
| <b>≥1 hospitalizations in prior year</b>                   | 6683 (27.8%)                                        | 665 (28.1%)                                                           | 6018 (27.7%)                                                                 | 0.698                       |
| <b>≥7 physician visits in prior year</b>                   | 3095 (12.9%)                                        | 313 (13.2%)                                                           | 2782 (12.8%)                                                                 | 0.583                       |
| <b>Comorbidities</b>                                       |                                                     |                                                                       |                                                                              |                             |
| . Any psychiatric disorder                                 | 9059 (37.6%)                                        | 924 (39.1%)                                                           | 8135 (37.5%)                                                                 | 0.133                       |
| . Hypertension                                             | 1276 (5.3%)                                         | 59 (2.5%)                                                             | 1217 (5.6%)                                                                  | <0.001                      |
| . Alcohol use                                              | 1307 (5.4%)                                         | 132 (5.6%)                                                            | 1175 (5.4%)                                                                  | 0.766                       |
| . Other drug use                                           | 2669 (11.1%)                                        | 324 (13.7%)                                                           | 2345 (10.8%)                                                                 | <0.001                      |
| . Diabetes                                                 | 710 (2.9%)                                          | 29 (1.2%)                                                             | 681 (3.1%)                                                                   | <0.001                      |
| <b>Active prescriptions at baseline</b>                    |                                                     |                                                                       |                                                                              |                             |
| . 0 or 1                                                   | 15,016 (62.4%)                                      | 1522 (64.4%)                                                          | 13,494 (62.2%)                                                               | 0.038                       |
| . ≥2                                                       | 9060 (37.6%)                                        | 843 (35.6%)                                                           | 8217 (37.8%)                                                                 |                             |
| <b>Medications filled in prior 90 days</b>                 |                                                     |                                                                       |                                                                              |                             |
| . Quetiapine                                               | 3411 (14.2%)                                        | 295 (12.5%)                                                           | 3116 (14.4%)                                                                 | 0.014                       |
| . Risperidone                                              | 3007 (12.5%)                                        | 335 (14.2%)                                                           | 2672 (12.3%)                                                                 | 0.010                       |
| . Olanzapine                                               | 1503 (6.2%)                                         | 157 (6.6%)                                                            | 1346 (6.2%)                                                                  | 0.428                       |
| . Aripiprazole                                             | 310 (1.3%)                                          | 14 (0.6%)                                                             | 296 (1.4%)                                                                   | 0.002                       |
| . Clozapine                                                | 76 (0.3%)                                           | <5                                                                    | 75 (0.3%)                                                                    | 0.021                       |
| . Other antipsychotics                                     | 1066 (4.4%)                                         | 100 (4.2%)                                                            | 966 (4.4%)                                                                   | 0.657                       |
| . Benzodiazepines                                          | 5986 (24.9%)                                        | 669 (28.3%)                                                           | 5317 (24.5%)                                                                 | <0.001                      |
| . Opioids                                                  | 2688 (11.2%)                                        | 295 (12.5%)                                                           | 2393 (11.0%)                                                                 | 0.036                       |

**Item S7: Baseline patient characteristics at schizophrenia diagnosis date (continued)**

| Characteristic                                | Drivers with schizophrenia, count (%)<br><br>n = 24,076 | Drivers with schizophrenia involved in a crash, count (%)<br><br>n = 2365 | Drivers with schizophrenia, not involved in a crash, count (%)<br><br>n = 21,711 | p-values, crash vs no crash |
|-----------------------------------------------|---------------------------------------------------------|---------------------------------------------------------------------------|----------------------------------------------------------------------------------|-----------------------------|
| <b>Driver licence type</b>                    |                                                         |                                                                           |                                                                                  | <0.001                      |
| . Learner                                     | 2420 (10.1%)                                            | 139 (5.9%)                                                                | 2281 (10.5%)                                                                     |                             |
| . Novice                                      | 2510 (10.4%)                                            | 348 (14.7%)                                                               | 2162 (10.0%)                                                                     |                             |
| . Full                                        | 16,985 (70.5%)                                          | 1682 (71.1%)                                                              | 15,303 (70.5%)                                                                   |                             |
| . No license                                  | 2161 (9.0%)                                             | 196 (8.3%)                                                                | 1965 (9.1%)                                                                      |                             |
| <b>Active license in prior 3 years</b>        | 19,375 (80.5%)                                          | 2103 (88.9%)                                                              | 17,272 (79.6%)                                                                   | <0.001                      |
| <b>Median years with full license</b>         | 10                                                      | 8                                                                         | 10                                                                               | <0.001                      |
| <b>Police-attended crash in prior 3 years</b> | 1561 (6.5%)                                             | 263 (11.1%)                                                               | 1298 (6.0%)                                                                      | <0.001                      |
| <b>Any contravention in prior 3 years</b>     | 7040 (29.2%)                                            | 1128 (47.7%)                                                              | 5912 (27.2%)                                                                     | <0.001                      |
| . Alcohol contravention                       | 1287 (5.3%)                                             | 239 (10.1%)                                                               | 1048 (4.8%)                                                                      | <0.001                      |
| . Speed contravention                         | 3178 (13.2%)                                            | 609 (25.8%)                                                               | 2569 (11.8%)                                                                     | <0.001                      |
| . Distraction contravention                   | 231 (1.0%)                                              | 17 (0.7%)                                                                 | 214 (1.0%)                                                                       | 0.249                       |

**Legend.** From a total of 24,076 individuals with a diagnosis of schizophrenia, 2365 (9.8%) were involved in a police-attended crash over a median follow-up of 3.3 years. Notably, although all cohort members had an active license at some point in our study interval, 19% of individuals with schizophrenia had a follow-up time of zero because they did not hold an active license at any point after the schizophrenia diagnosis date plus 30 days. Most drivers with schizophrenia were male, were between the ages 21 and 44 years, and held an active driver license in the past 3 years. Drivers with schizophrenia were overrepresented in lower-income residential neighbourhoods. About 40% crash-involved drivers had a psychiatric disorder at baseline (i.e.,  $\geq 1$  hospitalization or  $\geq 2$  physician visits with a diagnosis code corresponding to a psychiatric disorder), with a quarter of them on benzodiazepines. Compared to drivers with schizophrenia who were not involved in a crash, drivers with schizophrenia who were involved in a crash were younger, more likely to be male, more likely to have prior medical visits for drug use, more likely to have a Novice license, and more likely to have a prior contravention for alcohol or speed. The large sample size in our study can result in p-values <0.001 even when the difference between groups may not be clinically meaningful.

**Item S8: Age at schizophrenia diagnosis in the study cohort**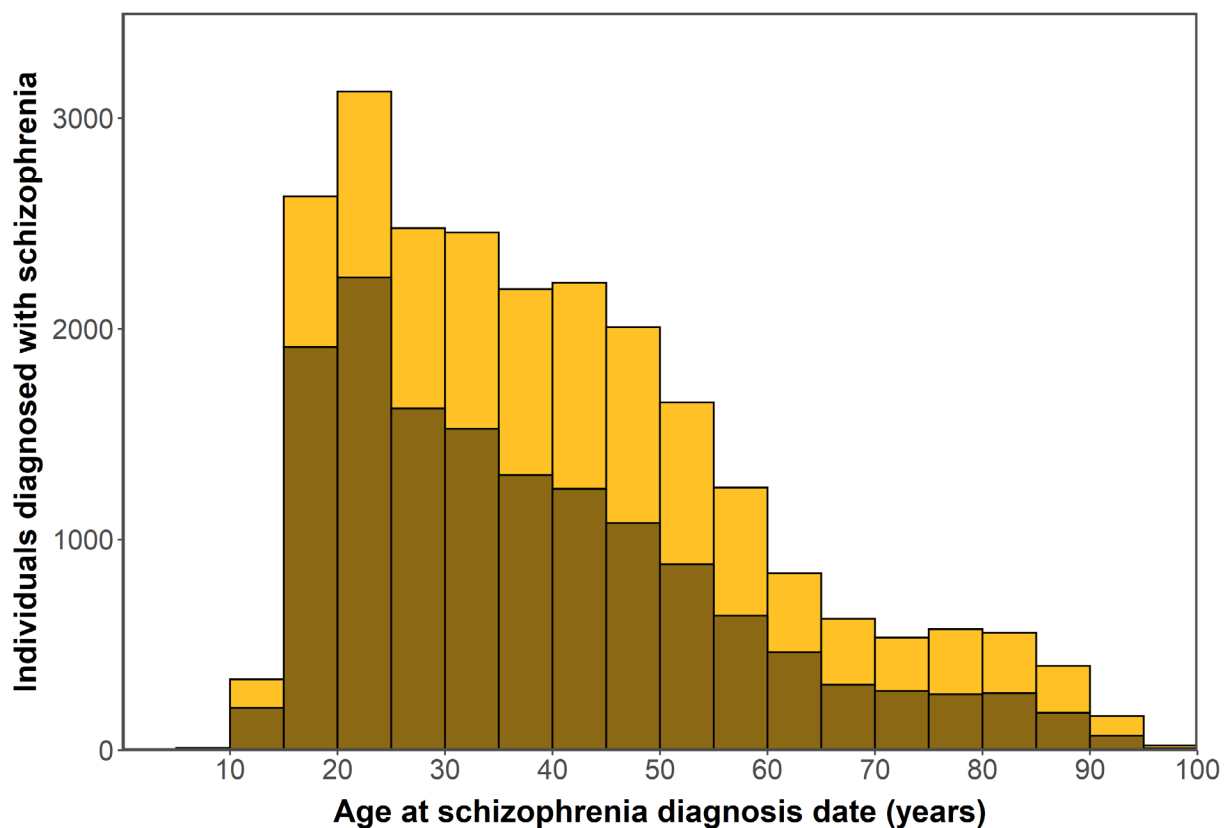

**Legend.** Stacked histogram of the number of drivers in our study cohort by age at schizophrenia diagnosis date. Darker brown (lower portion of bars) indicates number of males; brighter yellow (upper portion of bars) indicates number of females. In our cohort of individuals who also held a driver license during the study interval, the median age at schizophrenia diagnosis date was 38 years. In a meta-analysis of 36 studies, Solmi *et al* report that the median age at schizophrenia onset was 25 years.<sup>18</sup>

There are two principal reasons why the median age at schizophrenia diagnosis for our cohort of drivers is higher than the reported median age at symptom onset among all individuals eventually diagnosed with schizophrenia:

1. Our cohort only includes individuals with schizophrenia who held a driver license in the study interval. Solmi *et al* report that 12% of schizophrenia occurs prior to 18 years of age.<sup>18</sup> Individuals with adolescent-onset schizophrenia may be disproportionately excluded from our cohort as they are less likely than unaffected peers to go on to acquire a driver license. Maglione *et al* report that 20-29% of schizophrenia has an age of onset over 40 years.<sup>19</sup> Individuals with late onset schizophrenia may be overrepresented in our cohort as they had several decades to acquire a driver license before the onset of schizophrenia.

2. We derive diagnosis date from hospitalization and clinic visits. These healthcare system contacts are much more likely to occur with first episode of psychosis than to occur with the first onset of negative symptoms. First episode psychosis typically occurs several years after the onset of symptoms: Hafner *et al* report that the mean age of the first signs of schizophrenia is 25 years, while the mean age of the first episode (maximum psychiatric symptoms) is 30 years.<sup>21,20</sup>

Despite these differences, the histogram of age at diagnosis date that we present is strikingly similar to the age distribution of schizophrenia onset presented in other studies, including a peak age at diagnosis in the early 20s and a longer tail that lasts into later life (see Solmi *et al*'s Figure 4<sup>18</sup>; Hafner *et al*'s Figure 7.1<sup>21</sup>; Sham *et al*'s Figure 1a<sup>22</sup>; and Hilker *et al*'s Figure 1<sup>23</sup>). Our cohort also reflects the real-world population for whom clinicians are asked to make fitness-to-drive decisions.

**Item S9: Responsibility score components among responsible and non-responsible drivers (exposure: schizophrenia)**

| Characteristic                                              | Drivers deemed responsible for crash, count (%)<br>n = 434,119 | Drivers deemed non-responsible for crash, count (%)<br>n = 374,313 | Drivers with indeterminate responsibility, count (%)<br>n = 127,095 | p-values, responsible vs non-responsible |
|-------------------------------------------------------------|----------------------------------------------------------------|--------------------------------------------------------------------|---------------------------------------------------------------------|------------------------------------------|
| <b>Road Type</b>                                            |                                                                |                                                                    |                                                                     |                                          |
| <b>Traffic flow</b>                                         |                                                                |                                                                    |                                                                     | <0.001                                   |
| . One-way                                                   | 33,547 (7.7%)                                                  | 18,349 (4.9%)                                                      | 9772 (7.7%)                                                         |                                          |
| . Two-way                                                   | 388,593 (89.5%)                                                | 353,493 (94.4%)                                                    | 110,990 (87.3%)                                                     |                                          |
| . Other/unknown                                             | 11,979 (2.8%)                                                  | 2471 (0.7%)                                                        | 6333 (5.0%)                                                         |                                          |
| <b>Road class</b>                                           |                                                                |                                                                    |                                                                     | <0.001                                   |
| . Single lane                                               | 18,056 (4.2%)                                                  | 13,718 (3.7%)                                                      | 5083 (4.0%)                                                         |                                          |
| . Single lane, ramp                                         | 1827 (0.4%)                                                    | 1102 (0.3%)                                                        | 332 (0.3%)                                                          |                                          |
| . Multi-lane                                                | 344,479 (79.4%)                                                | 323,251 (86.4%)                                                    | 102,559 (80.7%)                                                     |                                          |
| . Multi-lane, ramp                                          | 1049 (0.2%)                                                    | 890 (0.2%)                                                         | 328 (0.3%)                                                          |                                          |
| . Not applicable                                            | 43,164 (9.9%)                                                  | 12,317 (3.3%)                                                      | 6068 (4.8%)                                                         |                                          |
| . Other/unknown                                             | 25,544 (5.9%)                                                  | 23,035 (6.2%)                                                      | 12,725 (10.0%)                                                      |                                          |
| <b>Crash location</b>                                       |                                                                |                                                                    |                                                                     | <0.001                                   |
| . At intersection                                           | 193,756 (44.6%)                                                | 196,620 (52.5%)                                                    | 69,759 (54.9%)                                                      |                                          |
| . Between intersection                                      | 168,568 (38.8%)                                                | 142,948 (38.2%)                                                    | 40,579 (31.9%)                                                      |                                          |
| . Parking lot                                               | 31,084 (7.2%)                                                  | 6511 (1.7%)                                                        | 4300 (3.4%)                                                         |                                          |
| . Other/unknown                                             | 40,711 (9.4%)                                                  | 28,234 (7.5%)                                                      | 12,457 (9.8%)                                                       |                                          |
| <b>Roadside hazard/design listed as contributory factor</b> | 2124 (0.5%)                                                    | 5416 (1.4%)                                                        | 999 (0.8%)                                                          | <0.001                                   |



**Item S9: Responsibility score components among responsible and non-responsible drivers (exposure: schizophrenia) (continued)**

| Characteristic                                          | Drivers deemed responsible for crash, count (%)<br><br>n = 434,119 | Drivers deemed non-responsible for crash, count (%)<br><br>n = 374,313 | Drivers with indeterminate responsibility, count (%)<br><br>n = 127,095 | p-values, responsible vs non-responsible |
|---------------------------------------------------------|--------------------------------------------------------------------|------------------------------------------------------------------------|-------------------------------------------------------------------------|------------------------------------------|
| <b>Driving Conditions</b>                               |                                                                    |                                                                        |                                                                         |                                          |
| <b>Road condition</b>                                   |                                                                    |                                                                        |                                                                         | <0.001                                   |
| . Dry                                                   | 284,250 (65.5%)                                                    | 205,106 (54.8%)                                                        | 90,330 (71.1%)                                                          |                                          |
| . Wet                                                   | 112,325 (25.9%)                                                    | 117,257 (31.3%)                                                        | 27,595 (21.7%)                                                          |                                          |
| . Snow/slush/ice/mud                                    | 33,361 (7.7%)                                                      | 49,662 (13.3%)                                                         | 5466 (4.3%)                                                             |                                          |
| . Other/unknown                                         | 4183 (1.0%)                                                        | 2288 (0.6%)                                                            | 3704 (2.9%)                                                             |                                          |
| <b>Road surface</b>                                     |                                                                    |                                                                        |                                                                         | <0.001                                   |
| . Asphalt/concrete                                      | 421,282 (97.0%)                                                    | 366,189 (97.8%)                                                        | 121,013 (95.2%)                                                         |                                          |
| . Stone/gravel/earth/wood                               | 11,450 (2.6%)                                                      | 7153 (1.9%)                                                            | 2755 (2.2%)                                                             |                                          |
| . Other/unknown                                         | 1387 (0.3%)                                                        | 971 (0.3%)                                                             | 3327 (2.6%)                                                             |                                          |
| <b>Weather</b>                                          |                                                                    |                                                                        |                                                                         | <0.001                                   |
| . Clear/cloudy                                          | 347,730 (80.1%)                                                    | 271,954 (72.7%)                                                        | 104,458 (82.2%)                                                         |                                          |
| . Rain/strong wind                                      | 64,545 (14.9%)                                                     | 73,329 (19.6%)                                                         | 16,215 (12.8%)                                                          |                                          |
| . Fog/smoke/smog                                        | 2987 (0.7%)                                                        | 4187 (1.1%)                                                            | 663 (0.5%)                                                              |                                          |
| . Snow/sleet/hail                                       | 14,119 (3.3%)                                                      | 22,331 (6.0%)                                                          | 1996 (1.6%)                                                             |                                          |
| . Other/unknown                                         | 4738 (1.1%)                                                        | 2512 (0.7%)                                                            | 3763 (3%)                                                               |                                          |
| <b>Lighting</b>                                         |                                                                    |                                                                        |                                                                         | <0.001                                   |
| . Daylight                                              | 290,948 (67%)                                                      | 245,838 (65.7%)                                                        | 88,422 (69.6%)                                                          |                                          |
| . Dusk/dawn                                             | 25,863 (6.0%)                                                      | 24,568 (6.6%)                                                          | 7222 (5.7%)                                                             |                                          |
| . Dark with full illumination                           | 33,473 (7.7%)                                                      | 26,915 (7.2%)                                                          | 10,287 (8.1%)                                                           |                                          |
| . Dark with no/some illumination                        | 80,688 (18.6%)                                                     | 75,191 (20.1%)                                                         | 17,925 (14.1%)                                                          |                                          |
| . Other/unknown                                         | 3147 (0.7%)                                                        | 1801 (0.5%)                                                            | 3239 (2.5%)                                                             |                                          |
| <b>Weather/visibility listed as contributory factor</b> | 26,926 (6.2%)                                                      | 29,007 (7.7%)                                                          | 1569 (1.2%)                                                             | <0.001                                   |
| <b>Vehicle Condition</b>                                |                                                                    |                                                                        |                                                                         | <0.001                                   |
| . Vehicle condition listed as contributory factor       | 2929 (0.7%)                                                        | 12,103 (3.2%)                                                          | 1460 (1.1%)                                                             |                                          |
| . Vehicle condition not listed as contributory factor   | 431,190 (99.3%)                                                    | 362,210 (96.8%)                                                        | 125,635 (98.9%)                                                         |                                          |

**Item S9: Responsibility score components among responsible and non-responsible drivers (exposure: schizophrenia) (continued)**

| Characteristic                                            | Drivers deemed responsible for crash, count (%)<br><br>n = 434,119 | Drivers deemed non-responsible for crash, count (%)<br><br>n = 374,313 | Drivers with indeterminate responsibility, count (%)<br><br>n = 127,095 | p-values, responsible vs non-responsible |
|-----------------------------------------------------------|--------------------------------------------------------------------|------------------------------------------------------------------------|-------------------------------------------------------------------------|------------------------------------------|
| <b>Unsafe Driving Actions</b>                             |                                                                    |                                                                        |                                                                         | <0.001                                   |
| . Index driver driving safely, obeying road laws          | 74,569 (17.2%)                                                     | 372,404 (99.5%)                                                        | 123,902 (97.5%)                                                         |                                          |
| . Index driver not driving safely or disobeying road laws | 359,550 (82.8%)                                                    | 1909 (0.5%)                                                            | 3193 (2.5%)                                                             |                                          |
| <b>Contribution Other Parties</b>                         |                                                                    |                                                                        |                                                                         | <0.001                                   |
| . Yes                                                     | 0 (0.0%)                                                           | 238,240 (63.6%)                                                        | 1649 (1.3%)                                                             |                                          |
| . No/index driver driving unsafely                        | 434,119 (100%)                                                     | 136,073 (36.4%)                                                        | 125,446 (98.7%)                                                         |                                          |
| <b>Crash Type</b>                                         |                                                                    |                                                                        |                                                                         |                                          |
| <b>Number of vehicles involved</b>                        |                                                                    |                                                                        |                                                                         | <0.001                                   |
| . Single vehicle                                          | 125,752 (29%)                                                      | 63,318 (16.9%)                                                         | 19,120 (15.0%)                                                          |                                          |
| . Two vehicles                                            | 265,481 (61.2%)                                                    | 235,298 (62.9%)                                                        | 88,928 (70.0%)                                                          |                                          |
| . Three or more vehicles                                  | 42,886 (9.9%)                                                      | 75,697 (20.2%)                                                         | 19,047 (15.0%)                                                          |                                          |
| <b>Diagram description</b>                                |                                                                    |                                                                        |                                                                         | <0.001                                   |
| . Intersection - right angle                              | 56,624 (13.0%)                                                     | 61,477 (16.4%)                                                         | 22,054 (17.4%)                                                          |                                          |
| . Head on                                                 | 12,060 (2.8%)                                                      | 15,917 (4.3%)                                                          | 4839 (3.8%)                                                             |                                          |
| . Rear end                                                | 92,074 (21.2%)                                                     | 124,656 (33.3%)                                                        | 23,035 (18.1%)                                                          |                                          |
| . Backing                                                 | 21,052 (4.8%)                                                      | 5963 (1.6%)                                                            | 3478 (2.7%)                                                             |                                          |
| . Turn                                                    | 65,017 (15.0%)                                                     | 53,633 (14.3%)                                                         | 26,452 (20.8%)                                                          |                                          |
| . Overtaking                                              | 11,162 (2.6%)                                                      | 7593 (2.0%)                                                            | 4436 (3.5%)                                                             |                                          |
| . Off road                                                | 83,361 (19.2%)                                                     | 33,581 (9.0%)                                                          | 8832 (6.9%)                                                             |                                          |
| . Other/unknown                                           | 92,769 (21.4%)                                                     | 71,493 (19.1%)                                                         | 33,969 (26.7%)                                                          |                                          |
| <b>Damage location</b>                                    |                                                                    |                                                                        |                                                                         | <0.001                                   |
| . Front                                                   | 195,777 (45.1%)                                                    | 125,346 (33.5%)                                                        | 53,952 (42.5%)                                                          |                                          |
| . Front/rear                                              | 6995 (1.6%)                                                        | 15,282 (4.1%)                                                          | 3696 (2.9%)                                                             |                                          |
| . Front/side                                              | 29,080 (6.7%)                                                      | 19,920 (5.3%)                                                          | 8504 (6.7%)                                                             |                                          |
| . Rear                                                    | 30,065 (6.9%)                                                      | 90,214 (24.1%)                                                         | 13,277 (10.4%)                                                          |                                          |
| . Rear/side                                               | 3655 (0.8%)                                                        | 5857 (1.6%)                                                            | 1137 (0.9%)                                                             |                                          |
| . Side                                                    | 52,845 (12.2%)                                                     | 49,941 (13.3%)                                                         | 15,050 (11.8%)                                                          |                                          |
| . Tires/undercarriage/windshield/roof                     | 3368 (0.8%)                                                        | 2597 (0.7%)                                                            | 1141 (0.9%)                                                             |                                          |
| . Whole vehicle                                           | 55,102 (12.7%)                                                     | 29,140 (7.8%)                                                          | 10,385 (8.2%)                                                           |                                          |
| . None                                                    | 26,590 (6.1%)                                                      | 14,178 (3.8%)                                                          | 8703 (6.8%)                                                             |                                          |
| . Other/unknown                                           | 30,642 (7.1%)                                                      | 21,838 (5.8%)                                                          | 11,250 (8.9%)                                                           |                                          |

**Item S9: Responsibility score components among responsible and non-responsible drivers (exposure: schizophrenia) (continued)**

| Characteristic                                      | Drivers deemed responsible for crash, count (%)<br><br>n = 43,4119 | Drivers deemed non-responsible for crash, count (%)<br><br>n = 374,313 | Drivers with indeterminate responsibility, count (%)<br><br>n = 127,095 | p-values, responsible vs non-responsible |
|-----------------------------------------------------|--------------------------------------------------------------------|------------------------------------------------------------------------|-------------------------------------------------------------------------|------------------------------------------|
| <b>Task Involved</b>                                |                                                                    |                                                                        |                                                                         |                                          |
| . Avoidance manoeuvre listed as contributory factor | 3114 (0.7%)                                                        | 8474 (2.3%)                                                            | 227 (0.2%)                                                              | <0.001                                   |
| <b>Pre-collision action</b>                         |                                                                    |                                                                        |                                                                         | <0.001                                   |
| . Straight                                          | 234,398 (54%)                                                      | 244,304 (65.3%)                                                        | 80,846 (63.6%)                                                          |                                          |
| . Backing                                           | 26,414 (6.1%)                                                      | 2376 (0.6%)                                                            | 2499 (2.0%)                                                             |                                          |
| . Turning                                           | 100,296 (23.1%)                                                    | 38,213 (10.2%)                                                         | 27,180 (21.4%)                                                          |                                          |
| . Changing lanes/merging                            | 9320 (2.1%)                                                        | 2413 (0.6%)                                                            | 1926 (1.5%)                                                             |                                          |
| . Loss of control                                   | 10,205 (2.4%)                                                      | 4331 (1.2%)                                                            | 768 (0.6%)                                                              |                                          |
| . Stopped/parked                                    | 8534 (2.0%)                                                        | 57,956 (15.5%)                                                         | 814 (0.6%)                                                              |                                          |
| . Other/unknown                                     | 44,952 (10.4%)                                                     | 24,720 (6.6%)                                                          | 13062 (10.3%)                                                           |                                          |

**Legend.** Relative to drivers deemed non-responsible for their crash, drivers deemed responsible for their crashes were far more likely to be disobeying road laws or not driving safely and to be involved in a single vehicle crash. Drivers deemed non-responsible were far more likely to have other drivers contribute to their crash, more likely to be stopped/parked at the time of crash, and more likely to be rear-ended. These findings are direct manifestations of the responsibility scoring tool that assigns responsibility based on these factors. They are also plausible and intuitively appealing contributors to crash responsibility. Drivers with indeterminate responsibility were not included in analyses and are presented here for descriptive purposes only. P-values compare responsible drivers to non-responsible drivers. The large sample size in our study may produce p-values <0.001 even in the absence of a clinically meaningful difference between groups.

**Item S10: Other crash characteristics among responsible and non-responsible drivers (exposure: schizophrenia)**

| Characteristic                      | Drivers deemed responsible for crash, count (%)<br>n = 434,119 | Drivers deemed non-responsible for crash, count (%)<br>n = 374,313 | Drivers with indeterminate responsibility, count (%)<br>n = 127,095 | p-values, responsible vs non-responsible |
|-------------------------------------|----------------------------------------------------------------|--------------------------------------------------------------------|---------------------------------------------------------------------|------------------------------------------|
| <b>Human conditions</b>             |                                                                |                                                                    |                                                                     |                                          |
| . Alcohol                           | 43,001 (9.9%)                                                  | 6662 (1.8%)                                                        | 4897 (3.9%)                                                         | <0.001                                   |
| . Medications                       | 1135 (0.3%)                                                    | 182 (0.0%)                                                         | 146 (0.1%)                                                          | <0.001                                   |
| . Drugs                             | 4472 (1.0%)                                                    | 714 (0.2%)                                                         | 472 (0.4%)                                                          | <0.001                                   |
| . Illness/fatigue                   | 7576 (1.7%)                                                    | 1306 (0.3%)                                                        | 942 (0.7%)                                                          | <0.001                                   |
| . Distracted/inattentive            | 119,900 (27.6%)                                                | 33,269 (8.9%)                                                      | 10,692 (8.4%)                                                       | <0.001                                   |
| . Pre-existing physical disability  | 1271 (0.3%)                                                    | 258 (0.1%)                                                         | 158 (0.1%)                                                          | <0.001                                   |
| <b>Breath alcohol positive</b>      |                                                                |                                                                    |                                                                     | <0.001                                   |
| . Yes                               | 6986 (1.6%)                                                    | 1515 (0.4%)                                                        | 1113 (0.9%)                                                         |                                          |
| . No evidence                       | 427,133 (98.4%)                                                | 372,798 (99.6%)                                                    | 125,982 (99.1%)                                                     |                                          |
| <b>Impaired by alcohol or drugs</b> |                                                                |                                                                    |                                                                     | <0.001                                   |
| . Yes                               | 47,821 (11%)                                                   | 8108 (2.2%)                                                        | 5805 (4.6%)                                                         |                                          |
| . No evidence                       | 386,298 (89.0%)                                                | 366,205 (97.8%)                                                    | 121,290 (95.4%)                                                     |                                          |
| <b>Crash severity</b>               |                                                                |                                                                    |                                                                     | <0.001                                   |
| . Casualty (fatal or injury)        | 201,754 (46.5%)                                                | 180,496 (48.2%)                                                    | 62,074 (48.8%)                                                      |                                          |
| . Property damage                   | 232,365 (53.5%)                                                | 193,817 (51.8%)                                                    | 65,021 (51.2%)                                                      |                                          |
| <b>Road location</b>                |                                                                |                                                                    |                                                                     | <0.001                                   |
| . Rural road                        | 20,618 (4.7%)                                                  | 13,728 (3.7%)                                                      | 3792 (3%)                                                           |                                          |
| . Provincial highway                | 113,897 (26.2%)                                                | 112,324 (30.0%)                                                    | 28,514 (22.4%)                                                      |                                          |
| . City street                       | 299,604 (69.0%)                                                | 248,261 (66.3%)                                                    | 94,789 (74.6%)                                                      |                                          |
| <b>Speed zone</b>                   |                                                                |                                                                    |                                                                     | <0.001                                   |
| . <50 km/h                          | 25,904 (6.0%)                                                  | 13,886 (3.7%)                                                      | 5390 (4.2%)                                                         |                                          |
| . 50 km/h                           | 233,730 (53.8%)                                                | 207,172 (55.3%)                                                    | 74,894 (58.9%)                                                      |                                          |
| . 60-70 km/h                        | 57,248 (13.2%)                                                 | 55,170 (14.7%)                                                     | 15,830 (12.5%)                                                      |                                          |
| . ≥80 km/h                          | 69,688 (16.1%)                                                 | 72,818 (19.5%)                                                     | 15,503 (12.2%)                                                      |                                          |
| . Other/unknown                     | 47,549 (11.0%)                                                 | 25,267 (6.8%)                                                      | 15,478 (12.2%)                                                      |                                          |
| <b>Vehicle damage severity</b>      |                                                                |                                                                    |                                                                     | <0.001                                   |
| . Light                             | 92,846 (21.4%)                                                 | 107,851 (28.8%)                                                    | 32,631 (25.7%)                                                      |                                          |
| . Moderate                          | 121,158 (27.9%)                                                | 11,9778 (32.0%)                                                    | 37,154 (29.2%)                                                      |                                          |
| . Severe                            | 112,460 (25.9%)                                                | 82,358 (22.0%)                                                     | 27,971 (22.0%)                                                      |                                          |
| . Demolished                        | 49,383 (11.4%)                                                 | 25,449 (6.8%)                                                      | 8709 (6.9%)                                                         |                                          |
| . None                              | 26,590 (6.1%)                                                  | 14,178 (3.8%)                                                      | 8703 (6.8%)                                                         |                                          |
| . Other/unknown                     | 31,682 (7.3%)                                                  | 24,699 (6.6%)                                                      | 11,927 (9.4%)                                                       |                                          |

**Item S10: Other crash characteristics among responsible and non-responsible drivers (exposure: schizophrenia) (continued)**

| Characteristic            | Drivers deemed responsible for crash, count (%)<br>n = 434,119 | Drivers deemed non-responsible for crash, count (%)<br>n = 374,313 | Drivers with indeterminate responsibility, count (%)<br>n = 127,095 | p-values, responsible vs non-responsible |
|---------------------------|----------------------------------------------------------------|--------------------------------------------------------------------|---------------------------------------------------------------------|------------------------------------------|
| <b>Crash year</b>         |                                                                |                                                                    |                                                                     | <0.001                                   |
| . 2000-2004               | 154,334 (35.6%)                                                | 120,253 (32.1%)                                                    | 41,909 (33.0%)                                                      |                                          |
| . 2005-2010               | 158,889 (36.6%)                                                | 138,030 (36.9%)                                                    | 44,688 (35.2%)                                                      |                                          |
| . 2011-2016               | 120,896 (27.8%)                                                | 116,030 (31.0%)                                                    | 40,498 (31.9%)                                                      |                                          |
| <b>Crash season</b>       |                                                                |                                                                    |                                                                     | <0.001                                   |
| . Winter (Dec-Feb)        | 105,160 (24.2%)                                                | 107,549 (28.7%)                                                    | 28,711 (22.6%)                                                      |                                          |
| . Spring (Mar-May)        | 102,907 (23.7%)                                                | 81,603 (21.8%)                                                     | 30,759 (24.2%)                                                      |                                          |
| . Summer (Jun-Aug)        | 114,229 (26.3%)                                                | 83,253 (22.2%)                                                     | 34,529 (27.2%)                                                      |                                          |
| . Fall (Sep-Nov)          | 111,823 (25.8%)                                                | 101,908 (27.2%)                                                    | 33,096 (26.0%)                                                      |                                          |
| <b>Day of week</b>        |                                                                |                                                                    |                                                                     | <0.001                                   |
| . Weekday (Mon-Thurs)     | 245,233 (56.5%)                                                | 219,121 (58.5%)                                                    | 74,249 (58.4%)                                                      |                                          |
| . Weekend (Fri-Sun)       | 188,886 (43.5%)                                                | 155,192 (41.5%)                                                    | 52,846 (41.6%)                                                      |                                          |
| <b>Time of day</b>        |                                                                |                                                                    |                                                                     | <0.001                                   |
| . Morning (6:01-12:00)    | 109,269 (25.2%)                                                | 99,185 (26.5%)                                                     | 31,980 (25.2%)                                                      |                                          |
| . Afternoon (12:01-18:00) | 184,254 (42.4%)                                                | 162,618 (43.4%)                                                    | 57,326 (45.1%)                                                      |                                          |
| . Evening (18:01-24:00)   | 93,636 (21.6%)                                                 | 83,669 (22.4%)                                                     | 26,708 (21.0%)                                                      |                                          |
| . Night (0:01-6:00)       | 37,896 (8.7%)                                                  | 21,502 (5.7%)                                                      | 8066 (6.3%)                                                         |                                          |
| . Other/unknown           | 9064 (2.1%)                                                    | 7339 (2.0%)                                                        | 3015 (2.4%)                                                         |                                          |

**Legend.** Relative to drivers deemed non-responsible for their crash, drivers deemed responsible for their crash were far more likely to have alcohol (unadjusted odds ratio (OR), 6.07; 95%CI, 5.91-6.23;  $p < 0.001$ ), drugs (OR, 5.45; 95%CI, 5.03-5.9;  $p < 0.001$ ), fatigue/illness (OR, 5.07; 95%CI, 4.78-5.38;  $p < 0.001$ ), and distraction/inattention (OR, 3.91; 95%CI, 3.86-3.96;  $p < 0.001$ ) listed by the attending police officer as contributors to the crash. They were also far more likely to be impaired by alcohol (OR, 5.59; 95%CI, 5.46-5.73;  $p < 0.001$ ). These are widely recognized risk factors for motor vehicle crash. They do not directly contribute to the calculation of the responsibility score, and the fact that they are nevertheless strongly associated with crash responsibility supports the face validity of responsibility analysis for identifying risk factors for crash. Drivers with indeterminate responsibility were not included in analyses and are presented here for descriptive purposes only. P-values compare responsible drivers to non-responsible drivers. The large sample size in our study may produce p-values  $< 0.001$  even in the absence of a clinically meaningful difference between groups.

**Item S11: Mirrored histograms of responsibility score components among responsible and non-responsible drivers (exposure: schizophrenia)**

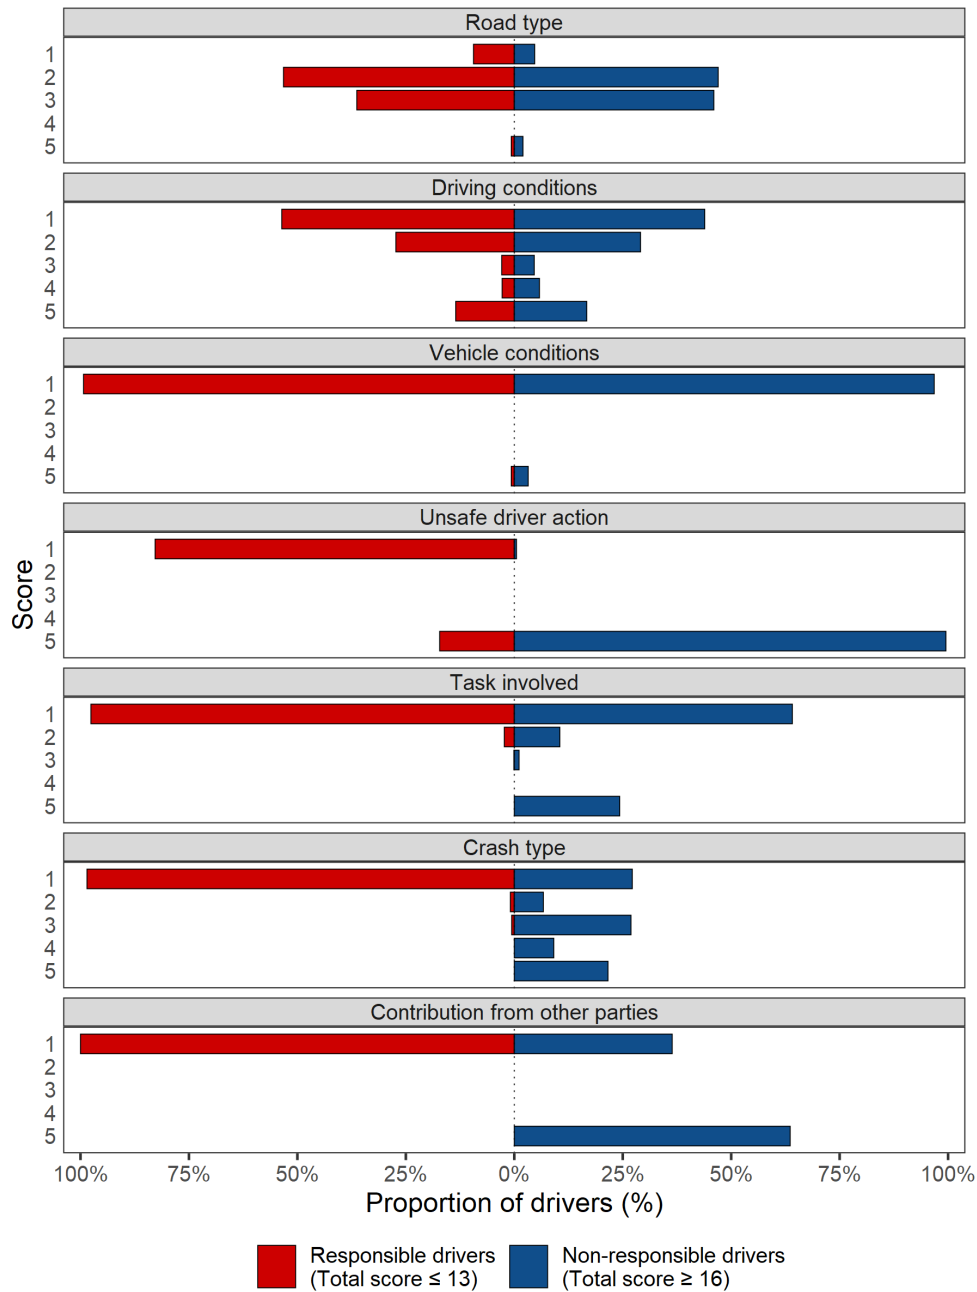

**Legend.** Mirrored histograms comparing scores between responsible and non-responsible drivers for each of the seven components of the responsibility score. The actions of the driver (through unsafe actions, task involved, and crash type) and the contributions from other drivers involved in the crash are the primary determinants of driver responsibility for crash.

**Item S12: Results for the main analysis of schizophrenia and crash responsibility**

| Variable                                                                                                    | Adjusted odds ratio (95%CI);<br>p-value |
|-------------------------------------------------------------------------------------------------------------|-----------------------------------------|
| Intercept                                                                                                   | 0.98 (0.95, 1.00); <0.045               |
| <b>Schizophrenia diagnosis prior to crash (exposure of interest)</b>                                        | <b>1.67 (1.53, 1.82); &lt;0.001</b>     |
| Crash-involved driver aged ≤20 years (referent: 21-44 years)                                                | 1.43 (1.40, 1.46); <0.001               |
| Crash-involved driver aged 45-64 years (referent: 21-44 years)                                              | 1.02 (1.00, 1.03); 0.009                |
| <b>Crash driver aged ≥65 years (referent: 21-44 years)</b>                                                  | <b>2.04 (2.00, 2.08); &lt;0.001</b>     |
| Male sex (referent: female)                                                                                 | 1.04 (1.03, 1.05); <0.001               |
| Unknown sex (referent: female)                                                                              | 1.46 (0.96, 2.23); 0.078                |
| Ordinal variable denoting residential neighbourhood income quintile (1 = lowest income, 5 = highest income) | 0.98 (0.97, 0.98); <0.001               |
| Residential rurality is "popCentreSmall" (referent: "popCentreMed")                                         | 1.02 (1.00, 1.03); 0.019                |
| Residential rurality is "ruralArea" (referent: "popCentreMed")                                              | 1.05 (1.04, 1.07); <0.001               |
| Residential rurality is "Missing" (referent: "popCentreMed")                                                | 1.10 (0.99, 1.23); 0.071                |
| Fraser Health Authority (referent: Vancouver Coastal Health (VCH))                                          | 0.97 (0.95, 0.98); <0.001               |
| Interior Health Authority (referent: VCH)                                                                   | 0.96 (0.94, 0.98); <0.001               |
| Vancouver Island Health Authority (referent: VCH)                                                           | 0.97 (0.95, 0.98); <0.001               |
| Northern Health Authority (referent: VCH)                                                                   | 0.81 (0.80, 0.83); <0.001               |
| Missing Health Authority (referent: VCH)                                                                    | 0.93 (0.84, 1.03); 0.149                |
| <b>Learner license type (referent: Full license)</b>                                                        | <b>2.39 (2.28, 2.50); &lt;0.001</b>     |
| Novice license type (referent: Full license)                                                                | 1.44 (1.42, 1.47); <0.001               |
| No license at time of crash (referent: Full license)                                                        | 2.74 (2.52, 2.99); <0.001               |
| Number of years with Full license                                                                           | 0.99 (0.99, 0.99); <0.001               |
| Number of police-attended crashes in prior 3 years                                                          | 1.09 (1.08, 1.10); <0.001               |
| Number of non-impairment related contraventions in prior 3 years                                            | 1.08 (1.08, 1.09); <0.001               |
| Number of impairment related contraventions in prior 3 years                                                | 1.23 (1.22, 1.25); <0.001               |
| Crash resulted in severe injury (referent: Property damage only)                                            | 0.94 (0.93, 0.95); <0.001               |
| Crash resulted in fatality (referent: Property damage only)                                                 | 1.19 (1.12, 1.25); <0.001               |
| Crash occurred at night                                                                                     | 0.88 (0.87, 0.89); <0.001               |
| Crash occurred on provincial highway (referent: city streets)                                               | 0.87 (0.86, 0.88); <0.001               |
| Crash occurred on rural road (referent: city streets)                                                       | 1.07 (1.05, 1.10); <0.001               |
| <b>Any documented impairment by alcohol or drugs at time of crash</b>                                       | <b>5.37 (5.24, 5.51); &lt;0.001</b>     |
| Hospitalizations for alcohol or other drug use in prior 3 years                                             | 1.02 (1.02, 1.02); <0.001               |
| Charlson comorbidity index ≥2                                                                               | 1.02 (1.01, 1.03); <0.001               |
| Years elapsed between first year of study interval and year of the crash                                    | 0.99 (0.99, 0.99); <0.001               |
| Crash occurred in the spring (Mar - May; referent: Winter)                                                  | 1.26 (1.24, 1.27); <0.001               |
| Crash occurred in the summer (Jun - Aug; referent: Winter)                                                  | 1.37 (1.35, 1.39); <0.001               |
| Crash occurred in the fall (Sep - Dec; referent: Winter)                                                    | 1.10 (1.08, 1.11); <0.001               |

**Legend.** Adjusted odds ratios for all terms included in the final model evaluating the association between schizophrenia and crash responsibility. Driver age ≥65 years, learner license type, and impairment by alcohol or drugs (blue text) are all more strongly associated with crash responsibility than a prior diagnosis of schizophrenia (red text).

**Item S13: Subgroup and sensitivity analyses for schizophrenia and crash responsibility**

| Analysis                                      | Drivers deemed responsible for crash, count (%) | Drivers deemed non-responsible for crash, count (%) | Unadjusted odds ratio (95% CI); p-value | Adjusted odds ratio (95% CI); p-value |
|-----------------------------------------------|-------------------------------------------------|-----------------------------------------------------|-----------------------------------------|---------------------------------------|
| <b>Main analysis</b>                          |                                                 |                                                     |                                         |                                       |
| . Main analysis                               | 434,119 (46.4%)                                 | 374,313 (40.0%)                                     | 1.69<br>(1.56, 1.84);<br>p<0.001        | 1.67<br>(1.53, 1.82);<br>p<0.001      |
| <b>Subgroup analyses</b>                      |                                                 |                                                     |                                         |                                       |
| . <b>Age</b>                                  |                                                 |                                                     |                                         |                                       |
| . ≤20 years                                   | 73,042 (60.1%)                                  | 35,696 (29.4%)                                      | 1.41<br>(1.01, 1.98);<br>p=0.046        | 1.29<br>(0.91, 1.83);<br>p=0.147      |
| . 21 to 44 years                              | 202,189 (44.9%)                                 | 185,292 (41.2%)                                     | 1.75<br>(1.57, 1.94);<br>p<0.001        | 1.61<br>(1.45, 1.80);<br>p<0.001      |
| . 45 to 64 years                              | 107,132 (40.2%)                                 | 120,604 (45.2%)                                     | 1.98<br>(1.69, 2.32);<br>p<0.001        | 1.81<br>(1.54, 2.13);<br>p<0.001      |
| . ≥65 years                                   | 51,756 (53.4%)                                  | 32,721 (33.7%)                                      | 2.02<br>(1.35, 3.03);<br>p<0.001        | 2.00<br>(1.33, 3.01);<br>p<0.001      |
| . <b>Sex</b>                                  |                                                 |                                                     |                                         |                                       |
| . Males                                       | 283,487 (47.5%)                                 | 233,001 (39.0%)                                     | 1.59<br>(1.44, 1.76);<br>p<0.001        | 1.51<br>(1.36, 1.67);<br>p<0.001      |
| . Females                                     | 150,566 (44.5%)                                 | 141,278 (41.8%)                                     | 1.89<br>(1.63, 2.18);<br>p<0.001        | 1.99<br>(1.72, 2.31);<br>p<0.001      |
| . <b>History of alcohol or other drug use</b> |                                                 |                                                     |                                         |                                       |
| . Yes                                         | 14,067 (61.0%)                                  | 6351 (27.5%)                                        | 1.10<br>(0.94, 1.29);<br>p=0.22         | 1.20<br>(1.02, 1.41);<br>p=0.03       |
| . No                                          | 420,052 (46.0%)                                 | 367,962 (40.3%)                                     | 1.57<br>(1.43, 1.73);<br>p<0.001        | 1.66<br>(1.51, 1.84);<br>p<0.001      |



**Item S13: Subgroup and sensitivity analyses for schizophrenia and crash responsibility (continued)**

| Analysis                                                                                                                                           | Drivers deemed responsible for crash, count (%) | Drivers deemed non-responsible for crash, count (%) | Unadjusted odds ratio (95% CI); p-value | Adjusted odds ratio (95% CI); p-value |
|----------------------------------------------------------------------------------------------------------------------------------------------------|-------------------------------------------------|-----------------------------------------------------|-----------------------------------------|---------------------------------------|
| <b>Sensitivity analyses</b>                                                                                                                        |                                                 |                                                     |                                         |                                       |
| <b>. Alternate exposure</b>                                                                                                                        |                                                 |                                                     |                                         |                                       |
| . Considered exposed only if prior hospitalization for schizophrenia)                                                                              | 434,119 (46.4%)                                 | 374,313 (40.0%)                                     | 1.74 (1.51, 2.01); p<0.001              | 1.75 (1.51, 2.03); p<0.001            |
| . No prior hospitalization for schizophrenia; met exposure criteria based on ≥3 clinic visits for schizophrenia within 36 months                   | 434,119 (46.4%)                                 | 374,313 (40.0%)                                     | 1.67 (1.51, 1.84); p<0.001              | 1.63 (1.47, 1.81); p<0.001            |
| <b>. Alternate outcome (crash type)</b>                                                                                                            |                                                 |                                                     |                                         |                                       |
| . Fatality                                                                                                                                         | 3676 (51.4%)                                    | 2326 (32.5%)                                        | 0.81 (0.30, 2.19); p=0.68               | 0.84 (0.29, 2.43); p=0.74             |
| . Fatality or injury                                                                                                                               | 201,754 (45.4%)                                 | 180,496 (40.6%)                                     | 1.54 (1.38, 1.73); p<0.001              | 1.56 (1.39, 1.76); p<0.001            |
| . Property damage only                                                                                                                             | 232,365 (47.3%)                                 | 193,817 (39.5%)                                     | 1.87 (1.66, 2.10); p<0.001              | 1.79 (1.58, 2.02); p<0.001            |
| <b>. Alternate responsibility score contrasts</b>                                                                                                  |                                                 |                                                     |                                         |                                       |
| . ≤12 vs ≥17                                                                                                                                       | 373,829 (40.0%)                                 | 297,285 (31.8%)                                     | 1.77 (1.61, 1.94); p<0.001              | 1.78 (1.62, 1.96) p<0.001             |
| . ≤13 vs ≥16 (main analysis)                                                                                                                       | 434,119 (46.4%)                                 | 374,313 (40.0%)                                     | 1.69 (1.56, 1.84); p<0.001              | 1.67 (1.53, 1.82); p<0.001            |
| . ≤14 vs ≥15                                                                                                                                       | 480,668 (51.4%)                                 | 440,243 (47.1%)                                     | 1.66 (1.54, 1.79); p<0.001              | 1.61 (1.49, 1.74); p<0.001            |
| <b>. Alternate exclusion criteria</b>                                                                                                              |                                                 |                                                     |                                         |                                       |
| Do not exclude individuals with hospitalizations or physician visits for psychosis or prescription fills for antipsychotics in washout (1997-1999) | 440,721 (46.5%)                                 | 378,627 (39.9%)                                     | 1.63 (1.53, 1.73); p<0.001              | 1.68 (1.58, 1.79); p<0.001            |

**Item S13: Subgroup and sensitivity analyses for schizophrenia and crash responsibility (continued)**

| Analysis                                                                                                                            | Drivers deemed responsible for crash, count (%) | Drivers deemed non-responsible for crash, count (%) | Unadjusted odds ratio (95% CI); p-value | Adjusted odds ratio (95% CI); p-value |
|-------------------------------------------------------------------------------------------------------------------------------------|-------------------------------------------------|-----------------------------------------------------|-----------------------------------------|---------------------------------------|
| <b>Additional analyses</b>                                                                                                          |                                                 |                                                     |                                         |                                       |
| Change in responsibility score per year since schizophrenia onset date (within subset of crash-involved drivers with schizophrenia) | 1689 (58.3%)                                    | 862 (29.8%)                                         | 0.95 (0.93, 0.97); p<0.001              | 0.96 (0.94, 0.99); p=0.002            |

**Legend.** The association between schizophrenia and crash responsibility appears to be stronger among female drivers. A prespecified model adding a male\*schizophrenia interaction term confirmed this difference is significant (aOR, 0.77; 95%CI, 0.64-0.92; p=0.004). We found the association between schizophrenia and crash responsibility to be stronger among drivers without recent visits for alcohol or drug use than it was among drivers with recent medical visits for alcohol and drug use. This might indicate that impairment 'overwhelms' schizophrenia as a determinant of crash risk among individuals with recent problematic drug use, and that schizophrenia is a more important determinant of crash responsibility in the absence of the known strong effect that alcohol and drug impairment have on crash risk. Findings are otherwise largely consistent across subgroup and sensitivity analyses.

There is a modest but significant decline in driver crash responsibility with each additional year that elapses between schizophrenia onset date and crash date, suggesting that typical changes in the clinical features of schizophrenia over time (i.e., fewer 'positive' symptoms such as auditory hallucinations, more 'negative' symptoms such as diminished emotional expression) are associated with a modest improvement in driving safety.

E-value analysis suggested the observed associations were at least moderately robust to potential unmeasured confounding. To make the main analysis odds ratio equivalent to a null effect (i.e., odds ratio = 1.00), an unmeasured confounder would need to be associated with crash responsibility and a prior schizophrenia diagnosis with a risk ratio of 1.91. To shift the lower bound of the 95% confidence interval to include the null value, an unmeasured confounder would need to be associated with crash responsibility and a prior schizophrenia diagnosis with a risk ratio of 1.78; weaker confounding could not account for the observed association.<sup>24,25</sup> We anticipate the main unmeasured confounder to be drug use beyond that captured by our data (i.e., recent medical visits for drug use, impairment suspected by the investigating officer, and documented impairment at the time of crash) and not accounted for through other covariates. We believe unmeasured confounding of this magnitude is unlikely given the effect sizes in **Item S12**.

**Item S14: Description of antipsychotic prescription fills**

**Item S14a: Most commonly filled antipsychotics among drivers with schizophrenia**

| Antipsychotic | Prescriptions filled after schizophrenia diagnosis, count (%) | Days supplied after schizophrenia diagnosis |
|---------------|---------------------------------------------------------------|---------------------------------------------|
| Quetiapine    | 908,704 (29.1%)                                               | 10,931,354 (26.2%)                          |
| Risperidone   | 677,381 (21.7%)                                               | 10,314,549 (24.8%)                          |
| Olanzapine    | 582,203 (18.6%)                                               | 8,220,296 (19.8%)                           |
| Clozapine     | 344,595 (11.0%)                                               | 6,381,103 (15.3%)                           |
| Aripiprazole  | 204,911 (6.6%)                                                | 3,117,308 (7.5%)                            |
| Other         | 406,221 (13.0%)                                               | 2,656,378 (6.4%)                            |

**Item S14b: Distribution of days supplied for antipsychotic prescription fills**

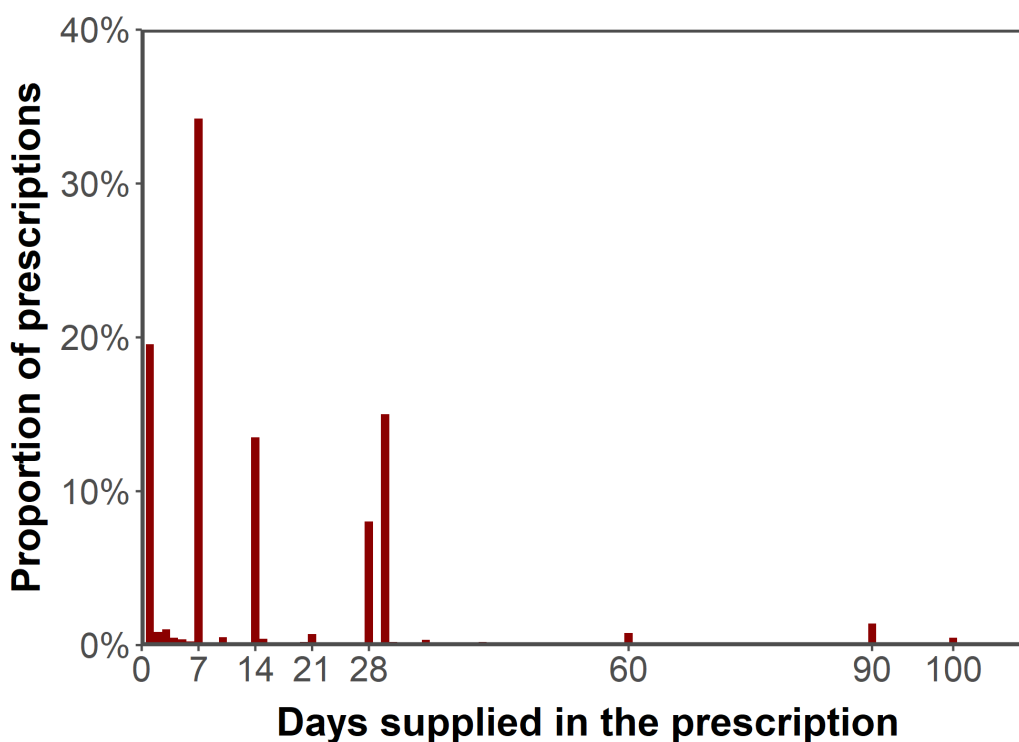

**Legend.** Histogram of the proportion of prescriptions with specific 'days supplied' after the diagnosis of schizophrenia in the adherence cohort. Almost 96% of prescription fills supplied  $\leq 30$  days of antipsychotics. Medication possession ratios calculated using prescription fills with lower 'days supplied' are more likely to generate accurate estimates of medication adherence.

**Item S15: Antipsychotic medication possession ratio in the first year after initiation of antipsychotics for schizophrenia**

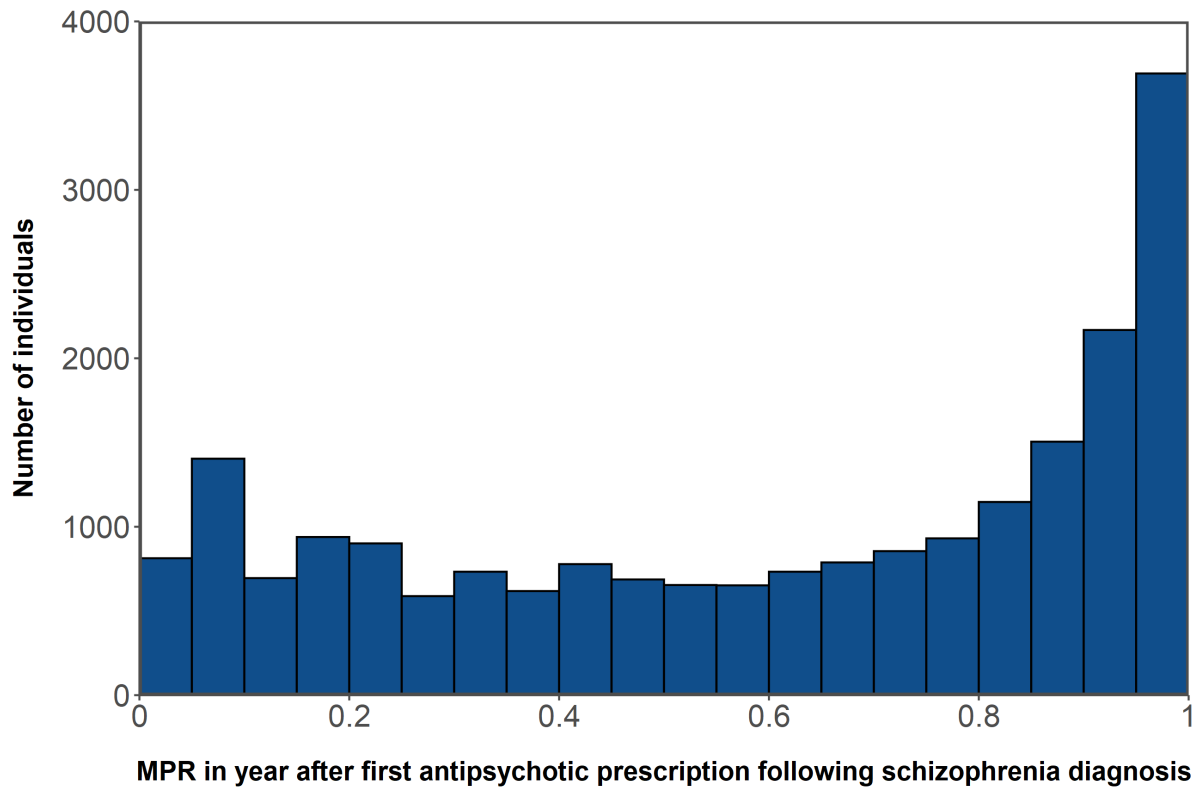

**Legend.** Histogram of individuals' antipsychotic medication possession ratio in the first year after the first antipsychotic prescription fill following the schizophrenia diagnosis date.

The mean MPR in the first year after antipsychotic prescription following schizophrenia diagnosis was 0.60. This is somewhat higher than other studies examining antipsychotic MPR among individuals with schizophrenia (e.g., 0.41 in Rezansoff Schizophrenia Bulletin 2017, 0.41 in Rezansoff Soc Psych Psych Epi 2016, 0.5 in Patel Curr Ther Res Clin Exp 2020). Our study design selected for individuals who filled at least one antipsychotic prescription in the year after schizophrenia diagnosis and at least one in the year prior to crash; these individuals may be more likely to be adherent than unselected individuals. We also selected crash-involved drivers who typically held a driver license and evidently had access to a vehicle on at least one occasion; these individuals may have less symptomatic forms of schizophrenia and more social support, factors that might result in improved antipsychotic adherence.

**Item S16: Responsibility score components among responsible and non-responsible drivers (exposure: antipsychotic adherence)**

| Characteristic                                              | Drivers deemed responsible for crash, count (%)<br><br>n = 1112 | Drivers deemed non-responsible for crash, count (%)<br><br>n = 512 | Drivers with indeterminate responsibility, count (%)<br><br>n = 209 | p-values, responsible vs non-responsible |
|-------------------------------------------------------------|-----------------------------------------------------------------|--------------------------------------------------------------------|---------------------------------------------------------------------|------------------------------------------|
| <b>Road Type</b>                                            |                                                                 |                                                                    |                                                                     |                                          |
| <b>Traffic flow</b>                                         |                                                                 |                                                                    |                                                                     |                                          |
| One-way                                                     | 91 (8.2%)                                                       | 21 (4.1%)                                                          | 17 (8.1%)                                                           | <0.001                                   |
| Two-way                                                     | 986 (88.7%)                                                     | 484 (94.5%)                                                        | 182 (87.1%)                                                         |                                          |
| Other/unknown                                               | 35 (3.1%)                                                       | 7 (1.4%)                                                           | 10 (4.8%)                                                           |                                          |
| <b>Road class</b>                                           |                                                                 |                                                                    |                                                                     | <0.001                                   |
| Single lane                                                 | 54 (4.9%)                                                       | 17 (3.3%)                                                          | 12 (5.7%)                                                           |                                          |
| Single lane, ramp                                           | 5 (0.4%)                                                        | 0 (0.0%)                                                           | 0 (0.0%)                                                            |                                          |
| Multi-lane                                                  | 852 (76.6%)                                                     | 446 (87.1%)                                                        | 163 (78%)                                                           |                                          |
| Multi-lane, ramp                                            | <5                                                              | 0 (0.0%)                                                           | 0 (0.0%)                                                            |                                          |
| Not applicable                                              | 129 (11.6%)                                                     | 20 (3.9%)                                                          | 12 (5.7%)                                                           |                                          |
| Other/unknown                                               | 71 (6.4%)                                                       | 29 (5.7%)                                                          | 22 (10.5%)                                                          |                                          |
| <b>Crash location</b>                                       |                                                                 |                                                                    |                                                                     | <0.001                                   |
| At intersection                                             | 442 (39.7%)                                                     | 281 (54.9%)                                                        | 106 (50.7%)                                                         |                                          |
| Between intersection                                        | 458 (41.2%)                                                     | 182 (35.5%)                                                        | 73 (34.9%)                                                          |                                          |
| Parking lot                                                 | 87 (7.8%)                                                       | 9 (1.8%)                                                           | 8 (3.8%)                                                            |                                          |
| Other/unknown                                               | 125 (11.2%)                                                     | 40 (7.8%)                                                          | 22 (10.5%)                                                          |                                          |
| <b>Roadside hazard/design listed as contributory factor</b> | <5                                                              | 6 (1.2%)                                                           | <5                                                                  | 0.109                                    |

**Item S16: Responsibility score components among responsible and non-responsible drivers (exposure: antipsychotic adherence) (continued)**

| Characteristic                                          | Drivers deemed responsible for crash, count (%)<br>n = 1112 | Drivers deemed non-responsible for crash, count (%)<br>n = 512 | Drivers with indeterminate responsibility, count (%)<br>n = 209 | p-values, responsible vs non-responsible |
|---------------------------------------------------------|-------------------------------------------------------------|----------------------------------------------------------------|-----------------------------------------------------------------|------------------------------------------|
| <b>Driving Conditions</b>                               |                                                             |                                                                |                                                                 |                                          |
| <b>Road condition</b>                                   |                                                             |                                                                |                                                                 | <0.001                                   |
| Dry                                                     | 752 (67.6%)                                                 | 273 (53.3%)                                                    | 147 (70.3%)                                                     |                                          |
| Wet                                                     | 288 (25.9%)                                                 | 162 (31.6%)                                                    | 53 (25.4%)                                                      |                                          |
| Snow/slush/ice/mud                                      | 58 (5.2%)                                                   | 72 (14.1%)                                                     | 7 (3.3%)                                                        |                                          |
| Other/unknown                                           | 14 (1.3%)                                                   | 5 (1.0%)                                                       | <5                                                              |                                          |
| <b>Road surface</b>                                     |                                                             |                                                                |                                                                 | 0.287                                    |
| Asphalt/concrete                                        | 1090 (98.0%)                                                | 507 (99.0%)                                                    | 204 (97.6%)                                                     |                                          |
| Stone/gravel/earth/wood                                 | 20 (1.8%)                                                   | <5                                                             | <5                                                              |                                          |
| Other/unknown                                           | <5                                                          | <5                                                             | <5                                                              |                                          |
| <b>Weather</b>                                          |                                                             |                                                                |                                                                 | <0.001                                   |
| Clear/cloudy                                            | 896 (80.6%)                                                 | 364 (71.1%)                                                    | 171 (81.8%)                                                     |                                          |
| Rain/strong wind                                        | 163 (14.7%)                                                 | 106 (20.7%)                                                    | 32 (15.3%)                                                      |                                          |
| Fog/smoke/smog                                          | 9 (0.8%)                                                    | 8 (1.6%)                                                       | 0 (0.0%)                                                        |                                          |
| Snow/sleet/hail                                         | 28 (2.5%)                                                   | 30 (5.9%)                                                      | <5                                                              |                                          |
| Other/unknown                                           | 16 (1.4%)                                                   | <5                                                             | <5                                                              |                                          |
| <b>Lighting</b>                                         |                                                             |                                                                |                                                                 | 0.735                                    |
| Daylight                                                | 721 (64.8%)                                                 | 325 (63.5%)                                                    | 127 (60.8%)                                                     |                                          |
| Dusk/dawn                                               | 74 (6.7%)                                                   | 28 (5.5%)                                                      | 15 (7.2%)                                                       |                                          |
| Dark with full illumination                             | 91 (8.2%)                                                   | 43 (8.4%)                                                      | 17 (8.1%)                                                       |                                          |
| Dark with no/some illumination                          | 216 (19.4%)                                                 | 112 (21.9%)                                                    | 48 (23.0%)                                                      |                                          |
| Other/unknown                                           | 10 (0.9%)                                                   | <5                                                             | <5                                                              |                                          |
| <b>Weather/visibility listed as contributory factor</b> | 52 (4.7%)                                                   | 50 (9.8%)                                                      | <5                                                              | <0.001                                   |
| <b>Vehicle Condition</b>                                |                                                             |                                                                |                                                                 | <0.001                                   |
| Vehicle condition listed as contributory factor         | 11 (1.0%)                                                   | 32 (6.2%)                                                      | <5                                                              |                                          |
| Vehicle condition not listed as contributory factor     | 1101 (99%)                                                  | 480 (93.8%)                                                    | 206 (98.6%)                                                     |                                          |

**Item S16: Responsibility score components among responsible and non-responsible drivers (exposure: antipsychotic adherence) (continued)**

| Characteristic                                          | Drivers deemed responsible for crash, count (%)<br>n = 1112 | Drivers deemed non-responsible for crash, count (%)<br>n = 512 | Drivers with indeterminate responsibility, count (%)<br>n = 209 | p-values, responsible vs non-responsible |
|---------------------------------------------------------|-------------------------------------------------------------|----------------------------------------------------------------|-----------------------------------------------------------------|------------------------------------------|
| <b>Unsafe Driving Actions</b>                           |                                                             |                                                                |                                                                 | <0.001                                   |
| Index driver driving safely, obeying road laws          | 221 (19.9%)                                                 | 506 (98.8%)                                                    | 206 (98.6%)                                                     |                                          |
| Index driver not driving safely or disobeying road laws | 891 (80.1%)                                                 | 6 (1.2%)                                                       | <5                                                              |                                          |
| <b>Contribution Other Parties</b>                       |                                                             |                                                                |                                                                 | <0.001                                   |
| Yes                                                     | 0 (0.0%)                                                    | 318 (62.1%)                                                    | 5 (2.4%)                                                        |                                          |
| No/index driver driving unsafely                        | 1112 (100%)                                                 | 194 (37.9%)                                                    | 204 (97.6%)                                                     |                                          |
| <b>Crash Type</b>                                       |                                                             |                                                                |                                                                 |                                          |
| <b>Number of vehicles involved</b>                      |                                                             |                                                                |                                                                 | <0.001                                   |
| Single vehicle                                          | 337 (30.3%)                                                 | 87 (17%)                                                       | 36 (17.2%)                                                      |                                          |
| Two vehicles                                            | 677 (60.9%)                                                 | 341 (66.6%)                                                    | 138 (66.0%)                                                     |                                          |
| Three or more vehicles                                  | 98 (8.8%)                                                   | 84 (16.4%)                                                     | 35 (16.7%)                                                      |                                          |
| <b>Diagram description</b>                              |                                                             |                                                                |                                                                 | <0.001                                   |
| Intersection - right angle                              | 112 (10.1%)                                                 | 95 (18.6%)                                                     | 26 (12.4%)                                                      |                                          |
| Head on                                                 | 34 (3.1%)                                                   | 16 (3.1%)                                                      | 9 (4.3%)                                                        |                                          |
| Rear end                                                | 252 (22.7%)                                                 | 173 (33.8%)                                                    | 40 (19.1%)                                                      |                                          |
| Backing                                                 | 55 (4.9%)                                                   | 9 (1.8%)                                                       | 11 (5.3%)                                                       |                                          |
| Turn                                                    | 131 (11.8%)                                                 | 79 (15.4%)                                                     | 38 (18.2%)                                                      |                                          |
| Overtaking                                              | 23 (2.1%)                                                   | 5 (1.0%)                                                       | 9 (4.3%)                                                        |                                          |
| Off road                                                | 244 (21.9%)                                                 | 52 (10.2%)                                                     | 23 (11.0%)                                                      |                                          |
| Other/unknown                                           | 261 (23.5%)                                                 | 83 (16.2%)                                                     | 53 (25.4%)                                                      |                                          |
| <b>Damage location</b>                                  |                                                             |                                                                |                                                                 | <0.001                                   |
| Front                                                   | 535 (48.1%)                                                 | 190 (37.1%)                                                    | 99 (47.4%)                                                      |                                          |
| Front/rear                                              | 18 (1.6%)                                                   | 19 (3.7%)                                                      | 6 (2.9%)                                                        |                                          |
| Front/side                                              | 78 (7.0%)                                                   | 27 (5.3%)                                                      | 16 (7.7%)                                                       |                                          |
| Rear                                                    | 70 (6.3%)                                                   | 100 (19.5%)                                                    | 20 (9.6%)                                                       |                                          |
| Rear/side                                               | 13 (1.2%)                                                   | <5                                                             | <5                                                              |                                          |
| Side                                                    | 125 (11.2%)                                                 | 73 (14.3%)                                                     | 18 (8.6%)                                                       |                                          |
| Tires/undercarriage/<br>windshield/roof                 | 12 (1.1%)                                                   | <5                                                             | 0 (0.0%)                                                        |                                          |
| Whole vehicle                                           | 141 (12.7%)                                                 | 41 (8.0%)                                                      | 25 (12.0%)                                                      |                                          |
| None                                                    | 53 (4.8%)                                                   | 21 (4.1%)                                                      | 7 (3.3%)                                                        |                                          |
| Other/unknown                                           | 67 (6.0%)                                                   | 37 (7.2%)                                                      | 16 (7.7%)                                                       |                                          |

**Item S16: Responsibility score components among responsible and non-responsible drivers (exposure: antipsychotic adherence) (continued)**

| Characteristic                                    | Drivers deemed responsible for crash, count (%)<br>n = 1112 | Drivers deemed non-responsible for crash, count (%)<br>n = 512 | Drivers with indeterminate responsibility, count (%)<br>n = 209 | p-values, responsible vs non-responsible |
|---------------------------------------------------|-------------------------------------------------------------|----------------------------------------------------------------|-----------------------------------------------------------------|------------------------------------------|
| <b>Task Involved</b>                              |                                                             |                                                                |                                                                 |                                          |
| Avoidance manoeuvre listed as contributory factor | 11 (1.0%)                                                   | 12 (2.3%)                                                      | 0 (0.0%)                                                        | 0.055                                    |
| <b>Pre-collision action</b>                       |                                                             |                                                                |                                                                 | <0.001                                   |
| Straight                                          | 607 (54.6%)                                                 | 348 (68.0%)                                                    | 120 (57.4%)                                                     |                                          |
| Backing                                           | 71 (6.4%)                                                   | <5                                                             | 12 (5.7%)                                                       |                                          |
| Turning                                           | 239 (21.5%)                                                 | 59 (11.5%)                                                     | 47 (22.5%)                                                      |                                          |
| Changing lanes/merging                            | 29 (2.6%)                                                   | <5                                                             | <5                                                              |                                          |
| Loss of control                                   | 32 (2.9%)                                                   | 10 (2.0%)                                                      | <5                                                              |                                          |
| Stopped/parked                                    | 25 (2.2%)                                                   | 54 (10.5%)                                                     | <5                                                              |                                          |
| Other/unknown                                     | 109 (9.8%)                                                  | 34 (6.6%)                                                      | 26 (12.4%)                                                      |                                          |

**Legend.** Responsibility score components for the 1833 crash-involved drivers in the adherence cohort (schizophrenia diagnosis date  $\geq 30$  days prior to the crash;  $\geq 1$  antipsychotic prescription fill after the diagnosis date;  $\geq 1$  antipsychotic prescription fill in the year prior to crash). P-values compare responsible drivers to non-responsible drivers; drivers with indeterminate responsibility are only included here for descriptive purposes.



**Item S17: Other crash characteristics among responsible and non-responsible drivers (exposure: antipsychotic adherence)**

| Characteristic                      | Drivers deemed responsible for crash, count (%)<br><br>n = 1112 | Drivers deemed non-responsible for crash, count (%)<br><br>n = 512 | Drivers with indeterminate responsibility, count (%)<br><br>n = 209 | p-values, responsible vs non-responsible |
|-------------------------------------|-----------------------------------------------------------------|--------------------------------------------------------------------|---------------------------------------------------------------------|------------------------------------------|
| <b>Human conditions</b>             |                                                                 |                                                                    |                                                                     |                                          |
| . Alcohol                           | 124 (11.2%)                                                     | 30 (5.9%)                                                          | 15 (7.2%)                                                           | <0.001                                   |
| . Medications                       | 32 (2.9%)                                                       | <5                                                                 | 5 (2.4%)                                                            | <0.001                                   |
| . Drugs                             | 55 (4.9%)                                                       | 8 (1.6%)                                                           | 12 (5.7%)                                                           | 0.002                                    |
| . Illness/fatigue                   | 42 (3.8%)                                                       | 8 (1.6%)                                                           | 9 (4.3%)                                                            | 0.025                                    |
| . Distracted/inattentive            | 435 (39.1%)                                                     | 91 (17.8%)                                                         | 44 (21.1%)                                                          | <0.001                                   |
| . Pre-existing physical disability  | 7 (0.6%)                                                        | <5                                                                 | <5                                                                  | 0.983                                    |
| <b>Breath alcohol positive</b>      |                                                                 |                                                                    |                                                                     | 0.996                                    |
| . Yes                               | 19 (1.7%)                                                       | 8 (1.6%)                                                           | 0 (0.0%)                                                            |                                          |
| . No evidence                       | 1093 (98.3%)                                                    | 504 (98.4%)                                                        | 209 (100%)                                                          |                                          |
| <b>Impaired by alcohol or drugs</b> |                                                                 |                                                                    |                                                                     | <0.001                                   |
| . Yes                               | 176 (15.8%)                                                     | 39 (7.6%)                                                          | 29 (13.9%)                                                          |                                          |
| . No evidence                       | 936 (84.2%)                                                     | 473 (92.4%)                                                        | 180 (86.1%)                                                         |                                          |
| <b>Crash severity</b>               |                                                                 |                                                                    |                                                                     | 0.008                                    |
| . Casualty (fatal or injury)        | 525 (47.2%)                                                     | 279 (54.5%)                                                        | 101 (48.3%)                                                         |                                          |
| . Property damage                   | 587 (52.8%)                                                     | 233 (45.5%)                                                        | 108 (51.7%)                                                         |                                          |
| <b>Road location</b>                |                                                                 |                                                                    |                                                                     | 0.017                                    |
| . Rural road                        | 55 (4.9%)                                                       | 10 (2.0%)                                                          | 6 (2.9%)                                                            |                                          |
| . Provincial highway                | 299 (26.9%)                                                     | 140 (27.3%)                                                        | 40 (19.1%)                                                          |                                          |
| . City street                       | 758 (68.2%)                                                     | 362 (70.7%)                                                        | 163 (78.0%)                                                         |                                          |
| <b>Speed zone</b>                   |                                                                 |                                                                    |                                                                     | <0.001                                   |
| . <50 km/h                          | 87 (7.8%)                                                       | 23 (4.5%)                                                          | 11 (5.3%)                                                           |                                          |
| . 50 km/h                           | 584 (52.5%)                                                     | 314 (61.3%)                                                        | 119 (56.9%)                                                         |                                          |
| . 60-70 km/h                        | 144 (12.9%)                                                     | 55 (10.7%)                                                         | 23 (11.0%)                                                          |                                          |
| . ≥80 km/h                          | 166 (14.9%)                                                     | 85 (16.6%)                                                         | 27 (12.9%)                                                          |                                          |
| . Other/unknown                     | 131 (11.8%)                                                     | 35 (6.8%)                                                          | 29 (13.9%)                                                          |                                          |

**Item S17: Other crash characteristics among responsible and non-responsible drivers (exposure: antipsychotic adherence) (continued)**

| Characteristic                 | Drivers deemed responsible for crash, count (%)<br><br>n = 1112 | Drivers deemed non-responsible for crash, count (%)<br><br>n = 512 | Drivers with indeterminate responsibility, count (%)<br><br>n = 209 | p-values, responsible vs non-responsible |
|--------------------------------|-----------------------------------------------------------------|--------------------------------------------------------------------|---------------------------------------------------------------------|------------------------------------------|
| <b>Vehicle damage severity</b> |                                                                 |                                                                    |                                                                     | <0.001                                   |
| . Light                        | 233 (21%)                                                       | 145 (28.3%)                                                        | 54 (25.8%)                                                          |                                          |
| . Moderate                     | 273 (24.6%)                                                     | 142 (27.7%)                                                        | 56 (26.8%)                                                          |                                          |
| . Severe                       | 314 (28.2%)                                                     | 130 (25.4%)                                                        | 50 (23.9%)                                                          |                                          |
| . Demolished                   | 148 (13.3%)                                                     | 35 (6.8%)                                                          | 26 (12.4%)                                                          |                                          |
| . None                         | 53 (4.8%)                                                       | 21 (4.1%)                                                          | 7 (3.3%)                                                            |                                          |
| . Other/unknown                | 91 (8.2%)                                                       | 39 (7.6%)                                                          | 16 (7.7%)                                                           |                                          |
| <b>Crash year</b>              |                                                                 |                                                                    |                                                                     | 0.121                                    |
| . 2000-2004                    | 151 (13.6%)                                                     | 51 (10.0%)                                                         | 17 (8.1%)                                                           |                                          |
| . 2005-2010                    | 404 (36.3%)                                                     | 195 (38.1%)                                                        | 68 (32.5%)                                                          |                                          |
| . 2011-2016                    | 557 (50.1%)                                                     | 266 (52.0%)                                                        | 124 (59.3%)                                                         |                                          |
| <b>Crash season</b>            |                                                                 |                                                                    |                                                                     | <0.001                                   |
| . Winter (Dec-Feb)             | 274 (24.6%)                                                     | 154 (30.1%)                                                        | 50 (23.9%)                                                          |                                          |
| . Spring (Mar-May)             | 263 (23.7%)                                                     | 108 (21.1%)                                                        | 50 (23.9%)                                                          |                                          |
| . Summer (Jun-Aug)             | 305 (27.4%)                                                     | 105 (20.5%)                                                        | 63 (30.1%)                                                          |                                          |
| . Fall (Sep-Nov)               | 270 (24.3%)                                                     | 145 (28.3%)                                                        | 46 (22.0%)                                                          |                                          |
| <b>Day of week</b>             |                                                                 |                                                                    |                                                                     | 0.210                                    |
| . Weekday (Mon-Thurs)          | 635 (57.1%)                                                     | 310 (60.5%)                                                        | 124 (59.3%)                                                         |                                          |
| . Weekend (Fri-Sun)            | 477 (42.9%)                                                     | 202 (39.5%)                                                        | 85 (40.7%)                                                          |                                          |
| <b>Time of day</b>             |                                                                 |                                                                    |                                                                     | 0.252                                    |
| . Morning (6:01-12:00)         | 273 (24.6%)                                                     | 112 (21.9%)                                                        | 45 (21.5%)                                                          |                                          |
| . Afternoon (12:01-18:00)      | 438 (39.4%)                                                     | 232 (45.3%)                                                        | 90 (43.1%)                                                          |                                          |
| . Evening (18:01-24:00)        | 281 (25.3%)                                                     | 114 (22.3%)                                                        | 59 (28.2%)                                                          |                                          |
| . Night (0:01-6:00)            | 93 (8.4%)                                                       | 42 (8.2%)                                                          | 15 (7.2%)                                                           |                                          |
| . Other/unknown                | 27 (2.4%)                                                       | 12 (2.3%)                                                          | 0 (0.0%)                                                            |                                          |

**Legend.** P-values compare responsible drivers to non-responsible drivers. Drivers with indeterminate responsibility were not included in analyses and are presented here for descriptive purposes only.

**Item S18: Mirrored histogram of responsibility score components among responsible and non-responsible drivers (exposure: antipsychotic adherence)**

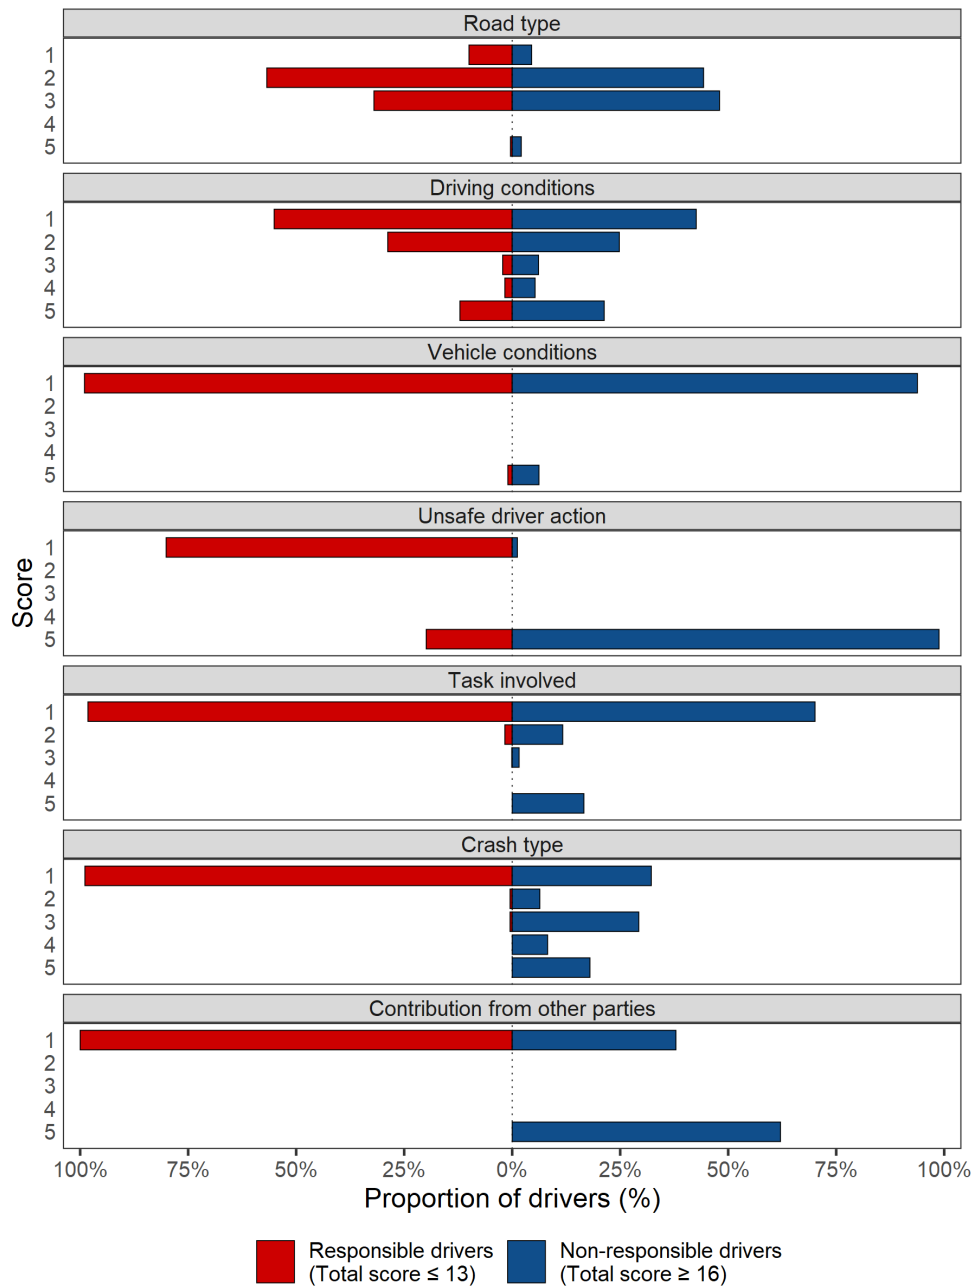

**Item S19: Sensitivity analysis of alternate MPR calculation lookback intervals**

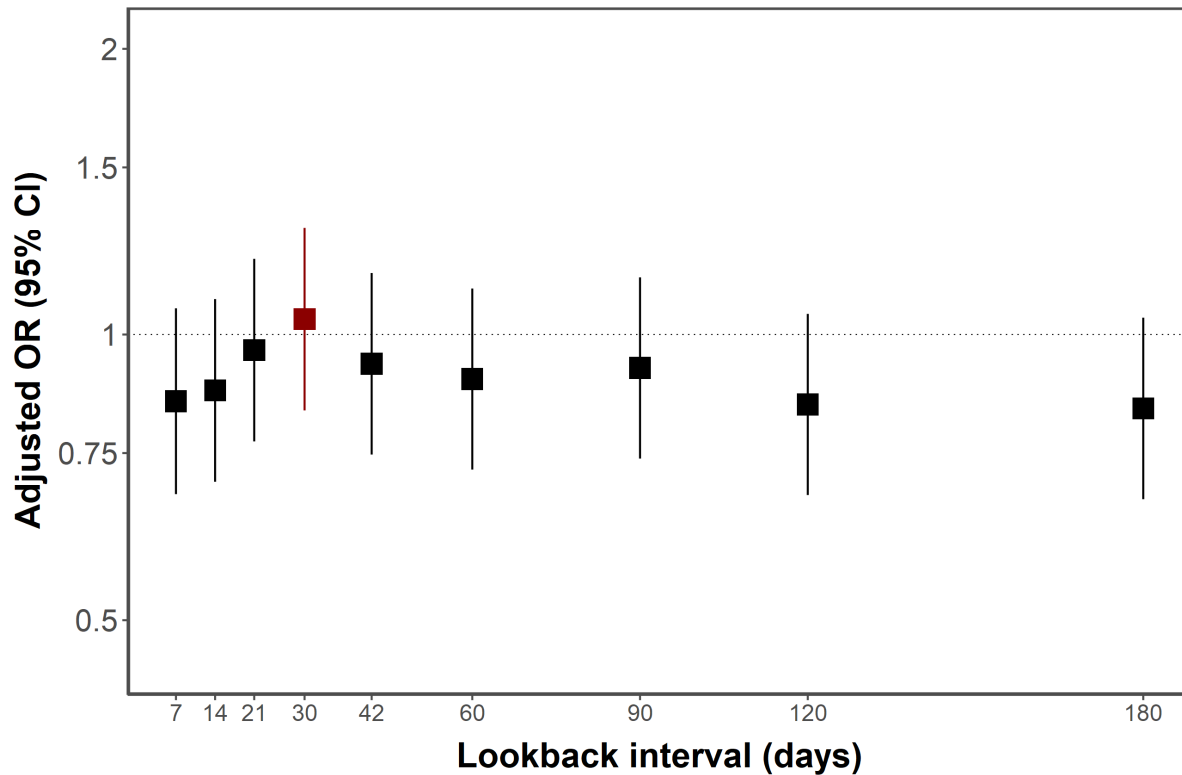

**Legend.** Forest plot of results using alternate medication possession ratio (MPR) lookback intervals. X-axis depicts the exposure lookback interval used in each analysis, measured in days; Y-axis, the adjusted odds ratio; squares, the adjusted odds ratio, with square size reflecting the inverse of the standard error; vertical lines, the 95% confidence interval. The main analysis is depicted in red. Overall, study results were robust to the duration of the exposure lookback interval.

**Item S20: Comparison of crash rates**

| <b>Value</b>                                                  | <b>Drivers with schizophrenia</b> | <b>Controls</b> |
|---------------------------------------------------------------|-----------------------------------|-----------------|
| Number of unique drivers                                      | 23,691                            | 4,694,300       |
| Number of unique drivers involved in a crash                  | 2365                              | 745,940         |
| Number of unique driver-crash combinations                    | 2896                              | 932,631         |
| Number of unique driver-crash combinations deemed responsible | 1689                              | 432,430         |
| <b>Absolute crash rate per driver</b>                         | <b>0.122</b>                      | <b>0.199</b>    |
| <b>Absolute crash rate per driver-year</b>                    | <b>0.009</b>                      | <b>0.015</b>    |
| <b>Responsible crash rate</b>                                 | <b>0.583</b>                      | <b>0.464</b>    |

**Legend.** Crash rate per driver is calculated by dividing the number of driver-crash combinations by the number of drivers. Crash rate per driver-year is calculated by dividing the number of driver-crash combinations by the number of driver-years of exposure (driver years are calculated by summing the total number of years each driver held an active license in BC during our study interval). Responsible crash rate is calculated by dividing the *number of responsible driver-crash combinations* by the *total number of driver-crash combinations* (note that results presented here include driver-crash combinations with indeterminate crash responsibility in the denominator and consequently and intentionally differ slightly from the responsible crash rates reported in the manuscript text). As expected, absolute crash rates are higher for controls but responsible crash rates are higher for individuals with schizophrenia, reflecting reduced road exposure but higher crash risk while driving among individuals with schizophrenia. This finding highlights a major advantage of using responsibility analysis to evaluate whether schizophrenia is a risk factor for crash.

**Item S21: Responsible crash rates by strata of antipsychotic adherence**

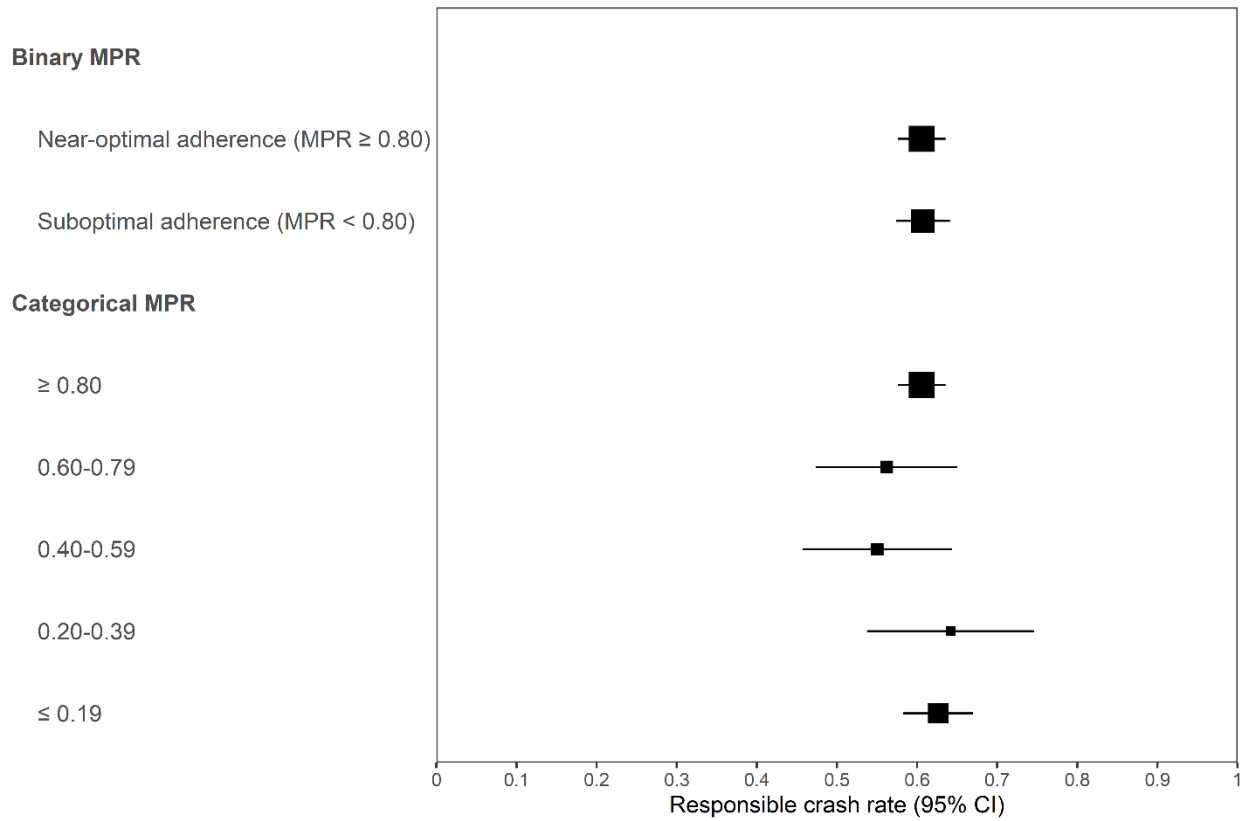

**Legend.** Forest plot with x-axis depicting the responsible crash rate; Y-axis, medication possession ratio (MPR) categories; black squares, point estimates, with size reflecting the inverse of the standard error; and horizontal lines, 95% confidence intervals. The proportion of crash-involved drivers deemed responsible for their crash was relatively constant across different levels of adherence, supporting the study conclusion that there is no association between antipsychotic adherence and driver responsibility for crash.

**Item S22: Assessment of correlation**

| Variable                                                                                                    | Adjusted OR<br>(95%CI)   | Adjusted OR<br>(robust 95%CI) | Ratio of<br>CI width<br>to robust<br>CI width |
|-------------------------------------------------------------------------------------------------------------|--------------------------|-------------------------------|-----------------------------------------------|
| Intercept                                                                                                   | 0.98 (0.95, 1.00)        | 0.98 (0.95, 1.00)             | 1.001                                         |
| <b>Schizophrenia diagnosis prior to crash (exposure of interest)</b>                                        | <b>1.67 (1.53, 1.82)</b> | <b>1.67 (1.53, 1.82)</b>      | <b>1.019</b>                                  |
| Crash-involved driver aged ≤20 years (referent: 21-45 years)                                                | 1.43 (1.40, 1.46)        | 1.43 (1.40, 1.46)             | 1.001                                         |
| Crash-involved driver aged 45-64 years (referent: 21-45 years)                                              | 1.02 (1.00, 1.03)        | 1.02 (1.00, 1.03)             | 0.999                                         |
| Crash driver aged ≥65 years (referent: 21-45 years)                                                         | 2.04 (2.00, 2.08)        | 2.04 (2.00, 2.08)             | 1.007                                         |
| Male sex (referent: female)                                                                                 | 1.04 (1.03, 1.05)        | 1.04 (1.03, 1.05)             | 1.000                                         |
| Unknown sex (referent: female)                                                                              | 1.46 (0.96, 2.23)        | 1.46 (0.96, 2.22)             | 0.997                                         |
| Ordinal variable denoting residential neighbourhood income quintile (1 = lowest income, 5 = highest income) | 0.98 (0.97, 0.98)        | 0.98 (0.97, 0.98)             | 0.999                                         |
| Residential rurality is "popCentreSmall" (referent: "popCentreMed")                                         | 1.02 (1.00, 1.03)        | 1.02 (1.00, 1.03)             | 1.001                                         |
| Residential rurality is "ruralArea" (referent: "popCentreMed")                                              | 1.05 (1.04, 1.07)        | 1.05 (1.04, 1.07)             | 1.000                                         |
| Residential rurality is "Missing" (referent: "popCentreMed")                                                | 1.10 (0.99, 1.23)        | 1.10 (0.99, 1.23)             | 1.005                                         |
| Fraser Health Authority (referent: Vancouver Coastal Health (VCH))                                          | 0.97 (0.95, 0.98)        | 0.97 (0.95, 0.98)             | 1.002                                         |
| Interior Health Authority (referent: VCH)                                                                   | 0.96 (0.94, 0.98)        | 0.96 (0.94, 0.98)             | 1.000                                         |
| Vancouver Island Health Authority (referent: VCH)                                                           | 0.97 (0.95, 0.98)        | 0.97 (0.95, 0.98)             | 1.001                                         |
| Northern Health Authority (referent: VCH)                                                                   | 0.81 (0.80, 0.83)        | 0.81 (0.80, 0.83)             | 0.997                                         |
| Missing Health Authority (referent: VCH)                                                                    | 0.93 (0.84, 1.03)        | 0.93 (0.83, 1.03)             | 1.006                                         |
| Learner license type (referent: Full license)                                                               | 2.39 (2.28, 2.50)        | 2.39 (2.28, 2.50)             | 1.007                                         |
| Novice license type (referent: Full license)                                                                | 1.44 (1.42, 1.47)        | 1.44 (1.42, 1.47)             | 1.001                                         |
| No license at time of crash (referent: Full license)                                                        | 2.74 (2.52, 2.99)        | 2.74 (2.52, 2.99)             | 0.996                                         |
| Number of years with Full license                                                                           | 0.99 (0.99, 0.99)        | 0.99 (0.99, 0.99)             | 1.003                                         |
| Number of police-attended crashes in prior 3 years                                                          | 1.09 (1.08, 1.10)        | 1.09 (1.08, 1.10)             | 1.006                                         |
| Number of non-impairment related contraventions in prior 3 years                                            | 1.08 (1.08, 1.09)        | 1.08 (1.08, 1.09)             | 1.006                                         |
| Number of impairment related contraventions in prior 3 years                                                | 1.23 (1.22, 1.25)        | 1.23 (1.21, 1.25)             | 1.032                                         |
| Crash resulted in severe injury (referent: Property damage only)                                            | 0.94 (0.93, 0.95)        | 0.94 (0.93, 0.95)             | 1.000                                         |
| Crash resulted in fatality (referent: Property damage only)                                                 | 1.19 (1.12, 1.25)        | 1.19 (1.12, 1.25)             | 0.984                                         |
| Crash occurred at night                                                                                     | 0.88 (0.87, 0.89)        | 0.88 (0.87, 0.89)             | 0.999                                         |
| Crash occurred on provincial highway (referent: city streets)                                               | 0.87 (0.86, 0.88)        | 0.87 (0.86, 0.88)             | 1.000                                         |
| Crash occurred on rural road (referent: city streets)                                                       | 1.07 (1.05, 1.10)        | 1.07 (1.05, 1.10)             | 0.992                                         |
| Any documented impairment by alcohol or drugs at time of crash                                              | 5.37 (5.24, 5.51)        | 5.37 (5.24, 5.51)             | 1.010                                         |
| Hospitalizations for alcohol or other drug use in prior 3 years                                             | 1.02 (1.02, 1.02)        | 1.02 (1.02, 1.02)             | 1.080                                         |
| Charlson comorbidity index ≥2                                                                               | 1.02 (1.01, 1.03)        | 1.02 (1.01, 1.03)             | 1.000                                         |
| Years elapsed between first year of study interval and year of the crash                                    | 0.99 (0.99, 0.99)        | 0.99 (0.99, 0.99)             | 0.999                                         |
| Crash occurred in the spring (Mar - May; referent: Winter)                                                  | 1.26 (1.24, 1.27)        | 1.26 (1.24, 1.27)             | 1.000                                         |
| Crash occurred in the summer (Jun - Aug; referent: Winter)                                                  | 1.37 (1.35, 1.39)        | 1.37 (1.35, 1.39)             | 1.000                                         |
| Crash occurred in the fall (Sep - Dec; referent: Winter)                                                    | 1.10 (1.08, 1.11)        | 1.10 (1.08, 1.11)             | 1.001                                         |

**Legend.** When crashes involved multiple drivers, all crash-involved drivers could contribute crash data to the analysis. Similarly, individuals involved in more than one police-attended crash could contribute all eligible crashes to the analysis. We decided *a priori* to treat each driver-crash combination as an independent observation, reasoning that:

1) Within any given crash, the 'outcome' for each driver ('responsible' vs 'non-responsible') is largely independent of the outcomes for other drivers involved in the same crash because a) each driver is scored independently; b) the crash responsibility scoring tool does not constrain one driver to be responsible and the others to be non-responsible; and c) the actions of the index driver, if unsafe, take precedence over most mitigating factors in the tool (including contributions from other parties).

2) Exposures (e.g., schizophrenia) for each driver are entirely independent.

We evaluated for evidence of correlation within crashes and individuals to evaluate whether this approach was reasonable. We compared the width of the 95% confidence interval for our model covariates to the width of a 95% confidence interval calculated using robust standard errors. We found that these two values were very similar, suggesting that significant correlation was not present, conditional on model covariates.



**Item S23: Sample sizes from prior epidemiological studies on schizophrenia and crash**

| Study                          | Exposed group                                                                                                                          | Control group                                                                                                   | Key findings                                                                                                                                                                                                                                                                                                                                                                                                                                                                                                                                                                                                                                                                                                                                                                                                                                                                                                                                                                                   |
|--------------------------------|----------------------------------------------------------------------------------------------------------------------------------------|-----------------------------------------------------------------------------------------------------------------|------------------------------------------------------------------------------------------------------------------------------------------------------------------------------------------------------------------------------------------------------------------------------------------------------------------------------------------------------------------------------------------------------------------------------------------------------------------------------------------------------------------------------------------------------------------------------------------------------------------------------------------------------------------------------------------------------------------------------------------------------------------------------------------------------------------------------------------------------------------------------------------------------------------------------------------------------------------------------------------------|
| Waller (1965) <sup>26,*</sup>  | 231 drivers with mental illness ("mostly schizophrenia & manic-depressive psychoses") currently                                        | 926 drivers randomly selected from license renewal applicants in California in June 1963                        | <p>This retrospective cohort study enrolled 292 individuals with mental illness who were currently under review by the California Department of Motor Vehicles (the "vast majority" because of a periodic medical report). Three-year crash and violation history was obtained. Individuals were asked to estimate their annual mileage. After exclusion of individuals with license revocation or no license in the prior 2 years, 231 drivers with mental illness remained.</p> <p>Drivers with mental illness had 2.1-fold more crashes (15.3 vs 7.2 per million miles; <math>p &lt; 0.001</math>) and 1.8-fold more violations (5.3 vs 3.0 per million miles; <math>p &lt; 0.001</math>) than expected based on age and prior license renewal duration (which was based on driving record).</p>                                                                                                                                                                                            |
| Crancer (1969) <sup>27</sup>   | 97 individuals hospitalized for "schizophrenic disorders" at King County Hospital in 1964                                              | 687,228 drivers "of the same age and sex distribution" as the exposed group                                     | <p>This retrospective cohort study examined crashes and violations occurring between 1961 and 1967 among King County residents with a valid Washington state driver license. Individuals with schizophrenic disorders had a crash rate almost identical to controls (0.33 vs 0.33 crashes per person; 8.2 vs 7.7 injury crashes per 100 persons) but a violation rate about 1.6-fold higher than among controls (0.71 vs 0.44 violations per person in first half of study interval; 0.88 vs 0.53 violations per person in the second half of study interval).</p>                                                                                                                                                                                                                                                                                                                                                                                                                             |
| Eelkema (1970) <sup>28,*</sup> | 71 individuals with psychosis discharged from the North Dakota State Hospital in 1960 (from among 238 individuals with mental illness) | 290 individuals from the general population of drivers, matched by age, sex, and county of residence to exposed | <p>This retrospective cohort study compared driving records of exposed and control groups after stratifying by diagnosis and sex.</p> <p>In the years prior to hospitalization (1949-1960), individuals with psychosis had more crashes (males, 10.4 vs 7.73 crashes per hundred driver-years, IRR 1.35; females, 9.26 vs 4.79 crashes per hundred driver-years, IRR 1.94) and more violations (males, 12.8 vs 10.2 crashes per hundred driver-years, IRR 1.25; females, 3.71 vs 2.93 crashes per hundred driver-years, IRR 1.27) than controls.</p> <p>In the years after hospitalization (1961-1965), individuals with psychosis had fewer crashes (males, 9.15 vs 10.3 crashes per hundred driver-years, IRR 0.89; females, 3.20 vs 9.18 crashes per hundred driver-years, IRR 0.35); males had more and females had fewer violations (males, 28.0 vs 10.9 crashes per hundred driver-years, IRR 2.57; females, 4.26 vs 5.24 crashes per hundred driver-years, IRR 0.81) than controls.</p> |

**Item S23: Sample sizes from prior epidemiological studies on schizophrenia and crash (continued)**

| Study                          | Exposed group                                                                                                                                | Control group                                                                                                                                          | Key findings                                                                                                                                                                                                                                                                                                                                                                                                                                                                                                                                                                                                                                                                                                                                                                                                                                                                                                                  |
|--------------------------------|----------------------------------------------------------------------------------------------------------------------------------------------|--------------------------------------------------------------------------------------------------------------------------------------------------------|-------------------------------------------------------------------------------------------------------------------------------------------------------------------------------------------------------------------------------------------------------------------------------------------------------------------------------------------------------------------------------------------------------------------------------------------------------------------------------------------------------------------------------------------------------------------------------------------------------------------------------------------------------------------------------------------------------------------------------------------------------------------------------------------------------------------------------------------------------------------------------------------------------------------------------|
| Sacher (1978) <sup>29</sup>    | 78 individuals with a clinically confirmed diagnosis of schizophrenia who also reported driving during the study interval                    | 100 age- and sex-matched controls drawn from the driver's register in the Canton of Zurich.                                                            | <p>This retrospective cohort study examined medical records from the Forensic Medical Institute in Zurich, police reports, and selected criminal records for exposed and control individuals between 1970 and 1975.</p> <p>Among individuals who reported driving during the study interval, those with schizophrenia had a crash rate 2.7-fold higher (0.030 vs 0.082 crashes per person-year; <math>p &lt; 0.001</math>) and a violation rate 1.8-fold higher (0.25 vs 0.13 violations per person-year; <math>p &lt; 0.001</math>) compared to controls.</p> <p>Among the 34 individuals with schizophrenia and reported mileage (and their age- and sex-matched controls), the crash rate was 3.1-fold higher (4.8 vs 1.5 crashes per million person-kilometers; <math>p = 0.039</math>) and the violation rate was 2.3-fold higher (14.4 vs 6.1 per million person-kilometers; <math>p = 0.003</math>) than controls.</p> |
| Armstrong (1980) <sup>30</sup> | 12 individuals with schizophrenia who were admitted to a private psychiatric hospital (drawn from a larger group of 100 with mental illness) | 100 individuals receiving treatment "for a variety of physical complaints" in a private general hospital; "matched for age, sex and social background" | <p>This retrospective cohort study interviewed individuals in Australia who were "regular vehicle drivers" about driving distances and crashes in the prior 6 months. Individuals with schizophrenia had a crash risk without adjustment for road exposure was about 3-fold higher than among controls, but this difference was not statistically significant (0.33 vs 0.11 crashes per person; relative risk, 2.8; 95%CI, 1.1-7.4; <math>p = 0.06</math>).</p>                                                                                                                                                                                                                                                                                                                                                                                                                                                               |
| Edlund (1989) <sup>31</sup>    | 70 outpatients diagnosed with schizophrenia who also reported driving a motor vehicle                                                        | 122 age-matched controls who reported driving a motor vehicle, recruited from among medical centre staff                                               | <p>This retrospective cohort study administered a questionnaire to exposed individuals and controls about possession of a driver license, approximate miles driven (0-100, 100-5000, 5000-10,000, &gt;10,000 miles), and crashes requiring professional medical attention by a physician in the prior year.</p> <p>Individuals with schizophrenia had a crash risk similar to controls (10.0% vs 9%; <math>p &gt; 0.05</math>), but they reported driving few miles (40% vs 98% drive &gt;100 miles; <math>p &lt; 0.00001</math>). Investigators concluded that per-mile crash risk might be substantially higher among individuals with schizophrenia.</p>                                                                                                                                                                                                                                                                   |
| <b>Total</b>                   | <b>257*</b>                                                                                                                                  | 978,476                                                                                                                                                |                                                                                                                                                                                                                                                                                                                                                                                                                                                                                                                                                                                                                                                                                                                                                                                                                                                                                                                               |

\* Studies by Waller and Eelkema were excluded from the tally of individuals with schizophrenia in studies of schizophrenia and driving because their exposures included but were not specific to schizophrenia.

## References

---

- <sup>1</sup> Population Data BC. Vancouver, BC: Population Data BC, 2016. (Accessed 28 Feb 2016 at [www.popdata.bc.ca](http://www.popdata.bc.ca))
- <sup>2</sup> Brubacher JR, Chan H, Erdelyi S, Zed PJ, Staples JA, Etminan M. Medications and risk of motor vehicle collision responsibility in British Columbia, Canada: a population-based case-control study. *Lancet Public Health*. 2021 Jun;6(6):e374-e385.
- <sup>3</sup> Staples JA, Erdelyi S, Merchant K, Yip C, Khan M, Redelmeier DA, Chan H, Brubacher JR. Syncope and the risk of subsequent motor vehicle crash: a population-based retrospective cohort study. *JAMA Intern Med*. 2022 Sep 1;182(9):934-942.
- <sup>4</sup> Staples JA, Erdelyi S, Merchant K, Yip C, Khan M, Redelmeier DA, Chan H, Brubacher JR. Syncope and subsequent traffic crash: A responsibility analysis. Accepted to *PLoS One* 4 January 2023.
- <sup>5</sup> Williams JI, Young W. Inventory of studies on the accuracy of Canadian health administrative databases. Toronto, Ontario: Institute for Clinical Evaluative Sciences, 1996.
- <sup>6</sup> Kurdyak P, Lin E, Green D, Vigod S. Validation of a population-based algorithm to detect chronic psychotic illness. *The Canadian Journal of Psychiatry*. 2015 Aug;60(8):362-8.
- <sup>7</sup> Rezvan PH, Lee KJ, Simpson JA. The rise of multiple imputation: a review of the reporting and implementation of the method in medical research. *BMC Medical Research Methodology*. 2015 Dec;15(1):1-4.
- <sup>8</sup> Sterne JA, White IR, Carlin JB, Spratt M, Royston P, Kenward MG, Wood AM, Carpenter JR. Multiple imputation for missing data in epidemiological and clinical research: potential and pitfalls. *BMJ*. 2009 Jun 29;338
- <sup>9</sup> Fazel S, Zetterqvist J, Larsson H, Långström N, Lichtenstein P. Antipsychotics, mood stabilisers, and risk of violent crime. *Lancet*. 2014 Sep 27;384(9949):1206-14.
- <sup>10</sup> Heinze G, Wallisch C, Dunkler D. Variable selection - A review and recommendations for the practicing statistician. *Biom J*. 2018 May;60(3):431-449.
- <sup>11</sup> Anghel LA, Farcas AM, Oprean RN. An overview of the common methods used to measure treatment adherence. *Medicine and Pharmacy Reports*. 2019 Apr;92(2):117.
- <sup>12</sup> Andrade SE, Kahler KH, Frech F, Chan KA. Methods for evaluation of medication adherence and persistence using automated databases. *Pharmacoepidemiology and Drug Safety*. 2006 Aug;15(8):565-74.

- <sup>13</sup> Karve S, Cleves MA, Helm M, Hudson TJ, West DS, Martin BC. An empirical basis for standardizing adherence measures derived from administrative claims data among diabetic patients. *Medical Care*. 2008 Nov 1;1125-33.
- <sup>14</sup> Messerli M, Blozik E, Vriends N, Hersberger KE. Impact of a community pharmacist-led medication review on medicines use in patients on polypharmacy-a prospective randomised controlled trial. *BMC Health Services Research*. 2016 Dec;16(1):145.
- <sup>15</sup> Alsabbagh MW, Eurich D, Lix LM, Wilson TW, Blackburn DF. Does the association between adherence to statin medications and mortality depend on measurement approach? A retrospective cohort study. *BMC Medical Research Methodology*. 2017 Dec;17(1):1-1.
- <sup>16</sup> Bjarnadóttir MV, Malik S, Onukwugha E, Gooden T, Plaisant C. Understanding adherence and prescription patterns using large-scale claims data. *Pharmacoeconomics*. 2016 Feb 1;34(2):169-79.
- <sup>17</sup> Bjarnadóttir MV, Czerwinski D, Onukwugha E. Sensitivity of the medication possession ratio to modelling decisions in large claims databases. *Pharmacoeconomics*. 2018 Mar;36(3):369-80.
- <sup>18</sup> Solmi M, Radua J, Olivola M, Croce E, Soardo L, Salazar de Pablo G, Il Shin J, Kirkbride JB, Jones P, Kim JH, Kim JY. Age at onset of mental disorders worldwide: Large-scale meta-analysis of 192 epidemiological studies. *Molecular Psychiatry*. 2022 Jan;27(1):281-95.
- <sup>19</sup> Maglione JE, Thomas SE, Jeste DV. Late-onset schizophrenia: do recent studies support categorizing LOS as a subtype of schizophrenia? *Current Opinion in Psychiatry*. 2014 May;27(3):173.
- <sup>20</sup> Galderisi S, Mucci A, Buchanan RW, Arango C. Negative symptoms of schizophrenia: new developments and unanswered research questions. *The Lancet Psychiatry*. 2018 Aug 1;5(8):664-77.
- <sup>21</sup> Häfner H, Maurer K, Löffler W, Riecher-Rössler A. The influence of age and sex on the onset and early course of schizophrenia. *The British Journal of Psychiatry*. 1993 Jan;162(1):80-6.
- <sup>22</sup> Sham PC, MacLean CJ, Kendler KS. A typological model of schizophrenia based on age at onset, sex and familial morbidity. *Acta Psychiatrica Scandinavica*. 1994 Feb;89(2):135-41.
- <sup>23</sup> Hilker R, Helenius D, Fagerlund B, Skytthe A, Christensen K, Werge TM, Nordentoft M, Glenthøj B. Is an early age at illness onset in schizophrenia associated with increased genetic susceptibility? Analysis of data from the Nationwide Danish Twin Register. *EBioMedicine*. 2017 Apr 1;18:320-6.
- <sup>24</sup> VanderWeele TJ, Ding P. Sensitivity analysis in observational research: introducing the E-value. *Annals of Internal Medicine*. 2017 Aug 15;167(4):268-74.

- <sup>25</sup> Zhang X, Stamey JD, Mathur MB. Assessing the impact of unmeasured confounders for credible and reliable real-world evidence. *Pharmacoepidemiology and Drug Safety*. 2020 Oct;29(10):1219-27.
- <sup>26</sup> Waller JA. Chronic medical conditions and traffic safety - Review of the California experience. *N Engl J Med*. 1965;273:1413-1420.
- <sup>27</sup> Crancer A Jr, Quiring DL. The mentally ill as motor vehicle operators. *Am J Psychiatr*. 1969; 126(6): 807-13.
- <sup>28</sup> Eelkema RC, Brosseau J, Koshnick R, McGee C. A statistical study on the relationship between mental illness and traffic accidents - a pilot study. *American Journal of Public Health Nations Health*. 1970;60(3):459-69.
- <sup>29</sup> Sacher P. Schizophrenie und Fahrtauglichkeit [Schizophrenia and the ability to drive]. *Schweiz Med Wochenschr*. 1978 Mar 11;108(10):373-9.
- <sup>30</sup> Armstrong JL, Whitlock FA. Mental illness and road traffic accidents. *Aust N Z J Psychiatry*. 1980 Mar;14(1):53-60.
- <sup>31</sup> Edlund MJ, Conrad C, Morris P. Accidents among schizophrenic outpatients. *Comprehensive Psychiatry*. 1989 Nov 1;30(6):522-6.
